1 **SMRT sequencing of the *Oryza rufipogon* genome**  
2 **reveals the genomic basis of rice adaptation**

3

4 Wei Li<sup>1</sup>, Kui Li<sup>1</sup>, Ying Huang<sup>3</sup>, Cong Shi<sup>2,4</sup>, Wu-Shu Hu<sup>3</sup>, Yun Zhang<sup>2</sup>, Qun-Jie Zhang<sup>1,2</sup>,  
5 En-Hua Xia<sup>2</sup>, Ge-Ran Hutang<sup>2,4</sup>, Xun-Ge Zhu<sup>2,4</sup>, Yun-Long Liu<sup>2</sup>, Yuan Liu<sup>2</sup>, Yan Tong<sup>2</sup>,  
6 Ting Zhu<sup>2,5</sup>, Hui Huang<sup>2</sup>, Dan Zhang<sup>1</sup>, Yuan Zhao<sup>6</sup>, Wen-Kai Jiang<sup>2</sup>, Jie Yuan<sup>3</sup>,  
7 Yong-Chao Niu<sup>7</sup>, Cheng-Wen Gao<sup>2</sup> & Li-Zhi Gao<sup>1,2</sup>

8

9 <sup>1</sup> Institution of Genomics and Bioinformatics, South China Agricultural University,  
10 Guangzhou 510642, China. <sup>2</sup> Plant Germplasm and Genomics Center, Germplasm Bank  
11 of Wild Species in Southwestern China, Kunming Institute of Botany, Chinese Academy  
12 of Sciences, Kunming 650204, China. <sup>3</sup> TGS Inc., Shenzhen 518000, China. <sup>4</sup> University  
13 of the Chinese Academy of Sciences, Beijing 100039, China. <sup>5</sup> College of Life Science,  
14 Liaoning Normal University, Dalian 116081, China. <sup>6</sup> Yunnan Agricultural University,  
15 Kunming 650201, China. <sup>7</sup> Genosys Inc., Shenzhen 518000, China.

16

17 These authors contributed equally: Wei Li, Kui Li, Ying Huang, Cong Shi.

18 Correspondence and requests for materials should be addressed to L.Z.G. (email:  
19 Lgaogenomics@163.com)

20

21 **Abstract**

22 Asian cultivated rice is believed to have been domesticated from an immediate ancestral  
23 progenitor, *Oryza rufipogon*, which provides promising sources of novel alleles for world  
24 rice improvement. Here we first present a high-quality *de novo* assembly of the typical *O.*  
25 *rufipogon* genome through the integration of single-molecule sequencing (SMRT), 10×  
26 and Hi-C technologies. This chromosome-based reference genome allows a multi-species  
27 comparative analysis of the annual selfing *O. sativa* and its two wild progenitors, the  
28 annual selfing *O. nivara* and perennial outcrossing *O. rufipogon*, identifying massive  
29 numbers of dispensable genes that are functionally enriched in reproductive process.  
30 Comparative genomic analyses identified millions of genomic variants, of which  
31 large-effect mutations (e.g., SVs, CNV and PAVs) may affect the variation of  
32 agronomically significant traits. We demonstrate how lineage-specific expansion of rice  
33 gene families may have contributed to the formation of reproduction isolation (e.g., the  
34 recognition of pollen and male sterility), thus brightening the role in driving mating  
35 system evolution during the evolutionary process of recent speciation. We document  
36 thousands of positively selected genes that are mainly involved in flower development,  
37 ripening, pollination, reproduction and response to biotic- and abiotic stresses. We show  
38 that selection pressures may serve as crucial forces to govern substantial genomic  
39 alterations among the three rice species that form the genetic basis of rapid evolution of  
40 mating and reproductive systems under diverse habitats. This first chromosome-based  
41 wild rice genome in the genus *Oryza* will become powerful to accelerate the exploration  
42 of untapped genomic diversity from wild rice for the enhancement of elite rice cultivars.

## 43 **Introduction**

44 Asian cultivated rice (*Oryza sativa* L.), which is grown worldwide and is one of the most  
45 important cereals for human nutrition, is thought to have been domesticated from an  
46 immediate ancestral progenitor, *O. rufipogon*, thousands of years ago<sup>1-5</sup>. During the  
47 process of domestication under intensive human cultivation, rice has undergone  
48 substantial phenotypic and physiological changes and has experienced an extensive loss  
49 of genetic diversity through successive bottlenecks and artificial selection for agronomic  
50 traits compared to its wild progenitor<sup>6,7</sup>. *O. rufipogon* span a broad geographical range of  
51 global pantropical regions<sup>8</sup>, and for example, extensively occur in diverse natural habitats  
52 in South China<sup>9,10</sup>. Although Asian cultivated rice is predominantly selfing, estimated  
53 outcrossing rates of Asian wild rice, which ranged from ~5 to 60%, showed that mating  
54 system is associated with life-history traits and results in the differentiation into two  
55 ecotypes: predominantly selfing annual *O. nivara* having high reproductive effort and  
56 mixed-mating *O. rufipogon* with low reproductive effort<sup>11-13</sup>. They offer promising  
57 sources of novel alleles for rice improvement that is of crucial significance in world rice  
58 production and food security. Many alien genes involved in rice improvement have  
59 successfully been introduced through introgression lines from *O. rufipogon* and have  
60 helped expand the rice gene pool important to the generation of environmentally resilient  
61 and higher-yielding varieties<sup>14</sup>, such as the discovery of the “wild-abortive rice” in *O.*  
62 *rufipogon* leading to a great success of hybrid rice<sup>15</sup>.

63 Despite this great interest, assembling a typical *O. rufipogon* genome has been  
64 extremely challenging due to the nature of outcrossing and self-incompatibility that result  
65 in a high rate of genome heterozygosity. This genomic complexity has long faced  
66 leading-edge assembly procedures compared to six other AA- genome *Oryza* species<sup>16</sup>.  
67 To overcome this challenge, we first present a chromosome-based assembly and  
68 annotation of the typical *O. rufipogon* genome through the integration of single-molecule  
69 sequencing, 10× and Hi-C technologies. We also performed a multi-species comparative  
70 analysis of *O. rufipogon*, *O. nivara* and *O. sativa* to offer valuable genomic resources for  
71 unlocking the untapped reservoir of this wild rice to enhance rice breeding programs.

72

## 73 **Results**

74 **Genome sequencing, assembly and annotation.** We sequenced the nuclear genome of *O.*  
75 *rufipogon* (RUF) from a typical natural population grown in Yuanjiang County, Yunnan  
76 Province, China. We performed a whole-genome shotgun sequencing (WGS) analysis  
77 with the single-molecule sequencing platform. This generated clean sequence data sets of  
78 ~39.47 Gb with average read length of 12.6 kb and yielded approximately 102.253-fold  
79 coverage (**Table 1**). The diploid FALCON-Unzip (version 0.3.0)<sup>17</sup> assembler resulted in  
80 an primary assembly of ~373.88 Mb with an contig N50 length of ~710.33 Kb  
81 (**Supplementary Table 1**). FALCON-Unzip also generated a combined 23.85 Mb of  
82 haplotype-resolved sequence, with an N50 of 29.47 Kb and a maximum length of 653.91  
83 Kb (**Supplementary Fig. 1; Supplementary Table 2**). Both SMRT and Illumina reads  
84 were used for the correction of genome assembly. Only the corrected primary contigs  
85 were used for further scaffolding. Aided with ~39.9 Gb (~103× genome coverage) 10 ×  
86 data, we further assembled contigs into scaffolds with an N50 length of ~2.21 Mb  
87 (**Supplementary Table 1**). About 97.35% of the assembly falls into 290 scaffolds larger  
88 than 100 Kb in length (**Supplementary Table 3**). To obtain a chromosome-based  
89 reference genome we sequenced ~103.9 Gb (~269× genome coverage) Hi-C data and  
90 anchored ~364.46 Mb sequences into 12 pseudo-chromosomes using Lachesis<sup>18</sup> with  
91 default parameters based on syntenic relationship with the *O. sativa* ssp. *japonica* cv.  
92 *Nipponbare* genome (MSU 7.0), representing ~94.42 % of the estimated genome size of  
93 *O. rufipogon* (~386 Mb) (**Supplementary Table 4**). The chromosomes lengths of the  
94 RUF genome varied from ~22 Mbp (Chr12) to ~44 Mbp (Chr01) with an average size of  
95 ~30 Mbp (**Figure 1; Supplementary Figure 2; Supplementary Table 4**). The  
96 assembled genome was referred to as *Oryza\_rufipogon\_v2.0*, which showed an extensive  
97 synteny conservation with the *O. sativa* ssp. *japonica* cv. *Nipponbare* genome (MSU 7.0)  
98 (**Supplementary Fig. 2**). To further improve the continuity of the genome assembly,  
99 captured gaps were filled using PBJelly2<sup>19</sup>. Thus, we obtained an assembly of 380.51 Mb,  
100 with a contig N50 length of 1,096 Kb and a scaffold N50 of 30.20 Mb (**Table 1;**  
101 **Supplementary Table 1**).

102 By adopting a method from Stefan et al.<sup>20</sup>, we attempted to detect haplotype  
103 variations between primary contigs and haplotigs. The show-snp tool implemented in the

104 MUMER package<sup>21</sup> was used to identify single nucleotide polymorphisms (SNPs) and  
105 indels. After aligning the haplotigs against the genome sequence, we obtained a total of  
106 84,227 SNPs and 54,407 indels, respectively. Using Assemblytics<sup>22</sup>, a web-based tool,  
107 large variants ( $\geq 10$  bp) between primary contigs and haplotigs were detected. A total of  
108 704 large variants were found, including 429 insertions, 247 deletions, 9 repeat  
109 expansions, 1 repeat contractions, 16 tandem expansion, and 2 tandem contraction  
110 (**Supplementary Fig. 3; Supplementary Table 5**). This phased genome assembly has  
111 largely improved our understanding of haplotype composition and genomic  
112 heterozygosity within a diploid genome that will help future rice breeding efforts.

113 To validate the genome assembly quality, we first mapped  $\sim 33.89$  Gb of high-quality  
114 reads to the assembled genome sequences, showing a good alignment with an average  
115 mapping rate of 93.0% (**Supplementary Table 6**); second, we aligned all available DNA,  
116 proteins of RUF from public databases and RNA sequencing (RNA-Seq) data obtained  
117 from four libraries representing major tissue types and developmental stages of the  
118 sequenced RUF individual, and obtained mapping rates of 86.94%,  $\sim 64.43\%$  and  
119  $\sim 71.34\%$ , respectively (**Supplementary Table 6**); and finally, we checked core gene  
120 statistics using BUSCO<sup>23</sup> to further verify the sensitivity of gene prediction and the  
121 completeness and appropriate haplotig merging of the genome assembly. Our gene  
122 predictions recovered 1,402 of the 1,440 (97.36%) highly conserved core proteins in the  
123 Embryophyta lineage (**Supplementary Table 6**).

124 In combination with *ab initio* prediction, protein and expressed sequence tags (ESTs)  
125 alignments, EvidenceModeler combing and further filtering, we predicted 34,830  
126 protein-coding genes (**Supplementary Table 7**). Of them, 84.2% of the gene models  
127 were supported by transcript and/or protein evidences (**Supplementary Table 8**). We also  
128 annotated non-coding RNA (ncRNA) genes, including transfer RNA (tRNA) genes,  
129 ribosomal RNA (rRNA) genes, small nucleolar RNA (snoRNAs) genes, small nuclear  
130 RNA (snRNAs) genes and microRNA (miRNAs) genes (**Supplementary Table 9**). In  
131 total, 245 miRNA genes belonging to 77 miRNA families were identified in the RUF  
132 genome (**Supplementary Table 9**). The annotation of repeat sequences showed that  
133 approximately 44.14% of the RUF genome consists of transposable elements (TEs),  
134 larger than the amount (39.40%) annotated in the SAT genome with the same methods

135 **(Supplementary Table 10)**. LTR retrotransposons were the most abundant TE type,  
136 occupying roughly 25.87% of the RUF genome. We annotated 218,967 simple sequence  
137 repeats (SSRs) that will provide valuable genetic markers to assist rice-breeding  
138 programs **(Supplementary Table 11)**.

139

140 **Multi-species comparative analysis of and genomic variation in *O. rufipogon*, *O.***  
141 ***nivara* and *O. sativa***. We performed a multi-species comparative analysis by comparing  
142 SAT with the two wild ancestral genomes, RUF and *O. nivara* (NIV)<sup>16</sup> **(Fig. 1;**  
143 **Supplementary Table 12)**, obtaining an overall statistic of 515,500,353 bp and a total set  
144 of 51,533 genes **(Fig. 2A; Supplementary Table 13)**. Our results showed the increase of  
145 total genes but the reduction of core genes from two pair rice genomes to the three  
146 genomes **(Fig. 2A)**. The core-genome size of the three species and average pan-genome  
147 size of any two species accounted for ~61.6% (317,729,226 bp) and ~92.1%  
148 (474,815,432 bp) of whole pan-genome **(Fig. 2B; Supplementary Table 13)**,  
149 respectively, suggesting that any single genome may not sufficiently represent the  
150 genomic diversity encompassed within the rice gene pool. Approximately 27.4% (14,135  
151 core genes) of the protein-coding genes were conserved across all three genomes, and  
152 nearly 44.6% (22,979 genes) were present in more than one but not all three rice genomes,  
153 representing the dispensable genome. Gene Ontology (GO) enrichment analysis showed  
154 that core genes were enriched in fundamental biological processes, while the functional  
155 category of reproductive process was intriguingly enriched in dispensable genes ( $P <$   
156 0.001; FDR < 0.001) **(Supplementary Table 14)**.

157 The completion of high-quality genome sequences of both cultivated *O. sativa* and  
158 the two immediate wild progenitors, *O. rufipogon* and *O. nivara*, enables us to detect  
159 genomic variation and characterize sequence variants of functionally important rice genes.  
160 We compared these three genomes to unearth genomic variation including  
161 single-nucleotide polymorphisms (SNPs), insertions or deletions (InDels), structural  
162 variants (SVs), copy number variation (CNVs) and presence-absence variation (PAVs)  
163 **(Fig. 1; Supplementary Fig. 4)**. SNPs and SVs were cataloged using reads mapping  
164 analysis and the assembly-based method, yielding 4,997,466 SNPs and 817,238 InDels in  
165 RUF and 3,794,980 SNPs and 779,252 InDels in NIV as compared to Nipponbare,

166 respectively (**Supplementary Table 15**). Notably, both wild rice (RUF and NIV)  
167 possessed considerably larger SNPs and InDels than cultivated SAT, and the outcrossing  
168 species RUF had larger SNPs and InDels than the predominantly two selfing rice species,  
169 NIV and SAT (**Supplementary Table 15**). This result is in a good agreement with rather  
170 high heterozygous SNP rates throughout the RUF genome than NIV and SAT (**Fig. 2C**;  
171 **Supplementary Fig. 5**). We examined the sequence variants for their potential functional  
172 effects on protein-coding genes, and identified a total of 446,309 and 349,519  
173 non-synonymous SNPs in RUF and NIV, respectively (**Supplementary Table 16**).  
174 Besides, we detected 17,124 and 14,083 SNPs that resulted in stop codon gains and 2,218  
175 and 1,730 SNPs that resulted in stop codon losses in RUF and NIV, respectively  
176 (**Supplementary Table 16**). Although the size distribution of insertions and deletions  
177 within protein-coding sequences indicated peaks at positions that are multiples of three  
178 owing to negative selection on frame-shift InDels (**Supplementary Fig. 6**), 25,139 and  
179 41,038 genomic SVs with large effect resulted in frameshifts in RUF and NIV,  
180 respectively (**Supplementary Table 16**). The identification of SNPs, Indels and/or SVs  
181 with large effect among SAT, RUF and NIV will accelerate the discovery of candidate  
182 genes related to the improvement of cultivated rice.

183 We integrated methods of reads mapping analysis and synteny comparisons to  
184 identify CNVs within hundreds of genes that had either gained or lost copies in RUF and  
185 NIV compared to SAT. Of 319 genes affecting both RUF and NIV, 88 had CNV loss, 145  
186 had CNV gain and 86 had both CNV loss and gain, while 6,940 and 940 genes occurred  
187 CNV gain and loss, respectively, in either RUF or NIV alone (**Supplementary Table 17**).  
188 GO enrichment analysis indicated that genes function in flower development  
189 (GO:0009908;  $P < 0.001$ ) and abiotic and biotic stresses, such as stress response and  
190 resistance (*R*)-genes with nucleotide-binding site (NBS) or NBS-leucine-rich repeat  
191 (LRR) domains and transcription factors were significantly enriched in genes affected by  
192 CNVs ( $P < 0.001$ ) (**Supplementary Tables 18, 19 and 20**). Further analyses showed that  
193 a large number of genes associated with rice flower development (**Supplementary**  
194 **Tables 21-25**) and resistance (*R*)-genes with nucleotide-binding site (NBS) or  
195 NBS-leucine-rich repeat (LRR) domains are remarkably affected by CNVs (**Fig. 2D**;  
196 **Supplementary Tables 26 and 27**). The results suggest that wild rice genes affected by



197 CNVs may be involved in flower development, flowering time, reproduction, and  
198 adaptation to changeable climatic environments and/or interaction with pathogens in  
199 nature.

200 Altogether, we identified 35,906 RUF-specific and 49,620 NIV-specific PAVs that  
201 account for ~26 Mbp of RUF-specific and ~32 Mbp of NIV-specific PAV (defined as >  
202 100 bp and <95% identity) (**Supplementary Tables 28 and 29 and Supplementary Fig.**  
203 **7**). There were 7,862 and 17,501 genes found to have at least 80% of their coding  
204 sequences composed of RUF- and NIV- specific sequences (**Supplementary Table 29**).  
205 Notably, functional annotation shows that a large number of genes affected by  
206 RUF-specific and NIV-specific PAVs are significantly enriched in functional categories  
207 involved in the disease resistance, such as NB-ARC domain (PF00931,  $P < 0.001$ ; FDR <  
208 0.001), Leucine rich repeat (PF13855,  $P < 0.05$ ; FDR < 0.05) and Leucine Rich Repeat  
209 (PF00560,  $P < 0.05$ ; FDR < 0.05), and response to environmental change, such as  
210 oxidoreductase activity (GO: 0016491,  $P < 0.05$ ; FDR < 0.05) (**Fig. 2E; Supplementary**  
211 **Tables 30 and 31**). These RUF-specific and/or NIV-specific R-genes with NBS domains,  
212 which are usually considered to mediate effector-triggered immunity acting as detectors  
213 for pathogen virulence proteins<sup>24</sup>, represent an important portion of the dispensable rice  
214 genome, some of which possibly reflect important gene sources of wild rice for the  
215 adaptation to biotic stresses under diverse habitats.

216

217 **Accelerated evolution of gene families actively drives rice adaptation.** To examine the  
218 evolution of gene families underlying physiological and phenotypic changes and rice  
219 species adaptation we compared the predicted proteomes of RUF, NIV and SAT, yielding  
220 a total of 29,879 orthologous gene families that comprised 100,238 genes  
221 (**Supplementary Table 32**). This revealed a core set of 72,490 genes belonging to 17,454  
222 clusters that were shared among all three rice species, representing ancestral gene  
223 families in Asian cultivated rice and the two presumed wild progenitors (**Fig. 3A**).  
224 Interestingly, 1,007 (2,473 genes), 437 (1,097 genes) and 239 (633 genes) gene clusters  
225 were found unique to RUF, NIV and Asian cultivated rice (SAT) (**Fig. 3A**). Functional  
226 enrichment analyses of RUF-specific genes by both Gene Ontology (GO) terms and  
227 PFAM domains together revealed functional categories related to stress up-regulated Nod



228 19 (PF07712,  $P < 0.001$ ), pathogenesis (GO:0009405,  $P < 0.001$ ), pollen allergen  
229 (PF01357,  $P < 0.001$ ), and root cap (PF06830,  $P < 0.001$ ) (**Supplementary Tables 33**  
230 **and 34**). Functional enrichment analyses of NIV-specific genes showed functional  
231 categories related to petal formation-expressed (PF14476,  $P < 0.001$ ) and photosynthesis  
232 processes, such as photosynthesis (GO:0015979,  $P < 0.001$ ), photosystem II  
233 (GO:0009523,  $P < 0.001$ ), photosystem II reaction center W protein (PsbW) (PF0712,  $P$   
234  $< 0.001$ ) (**Supplementary Tables 33 and 34**). Functional enrichment analyses of  
235 SAT-specific genes disclosed functional categories related to defense response  
236 (GO:0006952,  $P < 0.001$ ), response to oxidative stress (GO:0006979,  $P < 0.001$ ) and  
237 photosynthesis, such as photosynthesis (GO:0015979,  $P < 0.001$ ), photosynthesis, light  
238 reaction (GO:0019684,  $P < 0.001$ ), photosynthetic electron transport chain (GO:0009767,  
239  $P < 0.001$ ), photosynthetic electron transport in photosystem II (GO:0009772,  $P < 0.001$ ),  
240 photosystem (GO:0009521,  $P < 0.001$ ), photosystem I (GO:0009522,  $P < 0.001$ ),  
241 photosystem II (GO:0009523,  $P < 0.001$ ), photosystem II reaction center (GO:0009539,  
242  $P < 0.001$ ), photosystem II stabilization (GO:0042549,  $P < 0.001$ ), photosystem II 10  
243 kDa phosphoprotein (PF00737,  $P < 0.001$ ), photosystem II 4 kDa reaction center  
244 component (PF02533,  $P < 0.001$ ), photosystem II reaction centre X protein (PsbX)  
245 (PF06596,  $P < 0.001$ ), photosynthetic reaction center protein (PF00124,  $P < 0.001$ ),  
246 photosystem II protein (PF00421,  $P < 0.001$ ) (**Supplementary Tables 33 and 34**). The  
247 creation of new gene families in rice and the two wild progenitors may have contributed  
248 to the observed flowering-time phenotypic variation, response to biotic and abiotic  
249 stresses and formation of reproductive isolation that are crucial for reproductive success  
250 and influence the abilities of adaptation in a remarkably diverse range of worldwide  
251 habitats.

252 To understand the expansion or contraction of rice gene families causing phenotypic  
253 diversification we characterized gene families that undergo detectable changes and  
254 divergently evolve along different branches with a particular emphasis on those involved  
255 in phenotypic traits and environmental adaptation. Our results showed that, of the 23,755  
256 gene families (29,193 genes) inferred to be present in the most recent common ancestor  
257 of the four studied rice species, 2,486 (3,567), 790 (2,060) and 526 (3,741) exhibited  
258 significant expansions (contractions) ( $P < 0.001$ ; FDR  $< 0.001$ ) in the RUF, SAT and NIV

259 lineages, respectively (**Fig. 3B**; **Supplementary Fig. 8**; **Supplementary Table 35**).  
260 Remarkably, functional annotation demonstrates that a large number of genes enriched in  
261 functional categories involved in the recognition of pollen (GO:0048544,  $P < 0.001$ ) were  
262 significantly amplified in RUF but contracted in NIV in comparison with SAT  
263 (**Supplementary Table 36**). Compared with NIV and SAT, however, genes enriched in  
264 functional categories involved in the reproduction, including male sterility proteins  
265 (PF03015, PF07993,  $P < 0.001$ ) and petal formation-expressed protein (PF14476,  $P <$   
266  $0.001$ ), were significantly contracted in RUF (**Supplementary Table 37**). Compared with  
267 RUF and NIV we surprisingly found that gene families in SAT were significantly  
268 enriched in a number of functions related to defense response (GO:0006952,  $P < 0.001$ ),  
269 response to oxidative stress (GO:0006979,  $P < 0.001$ ), and photosynthesis in particular,  
270 including photosynthesis (GO:0015979,  $P < 0.001$ ), photosynthesis, light reaction  
271 (GO:0019684,  $P < 0.001$ ), photosynthetic electron transport in photosystem II  
272 (GO:0009772,  $P < 0.001$ ), photosystem I (GO:0009522,  $P < 0.001$ ) and photosynthetic  
273 reaction center protein (PF00124,  $P < 0.001$ ) (**Supplementary Table 36**).

274 Among the highly expanded and contracted gene families, we found that  
275 disease-resistance genes were significantly contracted in NIV but amplified in RUF and  
276 SAT, which are highly enriched in functional categories, including leucine rich repeats  
277 (PF12799, PF13855, PF13504;  $P < 0.001$ ), NB-ARC domain (PF00931,  $P < 0.001$ ) and  
278 Leucine rich repeat N-terminal domain (PF08263,  $P < 0.001$ ) (**Supplementary Tables**  
279 **35-37**). Whole-genome comparative analysis of the nucleotide-binding site with  
280 leucine-rich repeat (NBS-LRR) genes further revealed a large expansion of gene families  
281 relevant to an enhanced disease resistance in RUF. In total, we identified 576, 631 and  
282 489 genes encoding NBS-LRR proteins in RUF, SAT and NIV, respectively  
283 (**Supplementary Table 38**). The contraction in NIV *versus* RUF is mainly attributable to  
284 a decrease in CC-NBS, CC-NBS-LRR, NBS and NBS-LRR domains. It is noteworthy  
285 that, compared to the two wild progenitors, SAT exhibited an expansion of NBS-LRR  
286 genes, which mainly come from an increase of CC-NBS-LRR and NBS-LRR domains.  
287 We positioned these orthologous *R*-genes (~98%) to specific locations across the SAT  
288 chromosomes (**Fig. 3C**), showing an almost unequal distribution of the amplified  
289 NBS-encoding genes throughout the entire genome, particularly on Chromosome 11,

290 which offer a large number of disease resistance candidate loci for further functional  
291 studies and rice breeding programs.

292

293 **Natural selection on rice genes.** The three fairly closely related rice genomes provide a  
294 good model to assess the adaptive evolution of rice protein-coding genes under natural  
295 selection. We identified 10,206 high-confidence 1:1 orthologous gene families that were  
296 used to construct a phylogenetic tree and estimate divergence times among RUF, NIV and  
297 SAT using *O. meridionalis* (MER) as outgroup (**Supplementary Fig. 9**). Average  
298 synonymous (*dS*) and nonsynonymous (*dN*) gene divergence values varied but are well  
299 comparable to the branch lengths that account for lineage divergence (**Supplementary**  
300 **Fig. 9; Supplementary Table 39**). Overall, the observed branch-specific  $\omega$  values  
301 (nonsynonymous-synonymous rate ratio, *dN/dS*) were 0.5352, 0.6598 and 0.5382 for SAT,  
302 NIV and RUF, respectively (**Fig. 4A; Supplementary Fig. 10; Supplementary Table**  
303 **39**), suggesting that these three rice species may have experienced purifying selection. To  
304 test the hypothesis that the rapidly evolving genes showing increased *dN/dS* ratios have  
305 been under positive selection and are further promoted by speciation<sup>25</sup>, we looked for  
306 such footprints using likelihood ratio tests for the same orthologous gene set from the  
307 three AA-genomes. Consistent with previously reported genome-wide positive selection  
308 scans in the five rice genomes<sup>16</sup>, all tests identified a total of 2,053 non-redundant  
309 positively selected genes (PSGs) (false discovery rate, FDR < 0.05) (**Supplementary**  
310 **Tables 40-46**). Besides 1,799 PSGs in the site model tests for all branches, we detected  
311 that a total of 90, 199 and 476 branch-specific PSGs in SAT, RUF and NIV (**Fig. 4B;**  
312 **Supplementary Table 40**). Comparing previous genome-wide scans for positive  
313 selection<sup>26</sup>, we detected strikingly large proportions of PSGs in the overall phylogeny of  
314 rice species (~20.1%, 2,053) (**Supplementary Table 40**), which might be associated with  
315 the process of recent speciation and subsequently rapid adaptation to particularly varying  
316 environments.

317 The inclusion of the three rice genomes for all non-redundant PSGs yields a  
318 statistically significant enrichment for GO categories that span a wide range of functional  
319 categories, of which 65 genes involved in “flower development” and 51 in “response to  
320 biotic stimulus” categories showed evidence for positive selection (**Fig. 4C;**

321 **Supplementary Table 47**). Flower development-related traits, flowering times, the  
322 formation of reproduction, and adaptation to specific environments are crucial to and  
323 characteristic of the rapid evolution of mating and reproductive systems of these three  
324 closely related rice species inhabiting on different natural habitats. Hence, it is interesting  
325 that genes involved in flower development, reproduction, and resistance-related processes  
326 have been under positive selection in these species. With this in mind, we further  
327 examined functional enrichment for branch- or species-specific datasets of PSGs,  
328 showing that there is the largest number of PSGs in NIV (**Supplementary Table 47**).  
329 Notably, many candidate PSGs were significantly over-represented in categories related  
330 to ripening, flower development, pollination, reproduction and response to extracellular  
331 stimulus in NIV ( $P < 0.001$ ) (**Supplementary Table 47**). Indeed, we detected that up to  
332 71 genes known to play an important role in ripening (e. g., *MATE* efflux family), flower  
333 development (e. g., *OsIDS1*, *RFL*, *Hd1*, *Ehd2*, *OsSWN1*, *OsRRMh*) and reproduction (e.g.,  
334 *CSA*, *RAD51C*, *OsGAMYB*, *TDR*, *GnT1*, *DPW*, *SDS*, *OsMSH5*, *OsABCG15*, *OsCOM1*,  
335 *OsMYB80*) pathways show signs of positive selection (**Fig. 4D; Supplementary Table**  
336 **48**).  
337

## 338 Discussion

339 The completion of the two subspecies genomes of *O. sativa*<sup>27-30</sup> has greatly enhanced the  
340 identification and characterization of functionally important genes for the rice community.  
341 The availability of the first chromosome-based high-quality reference genome of *O.*  
342 *rufipogon*, presented here, have contiguity improvements over the published *O. rufipogon*  
343 genomes based on NGS technologies<sup>4,31</sup>. This typical Asian wild rice genome is, to our  
344 knowledge, the first long read assembly among numerous wild progenitors of  
345 domesticated crops, and now provides powerful genomic resources to investigate the  
346 orthologous loci and genomic regions associated with agronomically significant traits of  
347 cultivated rice. The past century has witnessed the achievement to breed environmentally  
348 resilient and high-yielding rice varieties owing to the introduction of alien genes of *O.*  
349 *rufipogon* and other AA- genome relatives to expand the gene pool of Asian cultivated  
350 rice<sup>32</sup>. Thus, the completion of the *O. rufipogon* genome together with the availability of  
351 Nipponbare and six other AA-genomes<sup>16,27,33,34</sup> will become valuable genomic resources  
352 to enhance the exploitation of wild rice germplasms for rice genetic improvement.

353 Genomic variation has been extensively investigated through comparisons of  
354 genome assemblies of the *Oryza* species<sup>16,31</sup> and population genomic analysis of *O.*  
355 *rufipogon* based only on Illumina reads<sup>35</sup>. This study drew a map of genomic variation  
356 and addressed questions that do not largely overlap former studies<sup>16,31,35</sup>. We performed a  
357 multi-species comparative analysis of ~~reconstructed a pan-genome of~~ the annual selfing *O.*  
358 *sativa* and its two wild progenitors, the annual selfing *O. nivara* and perennial  
359 outcrossing *O. rufipogon*, using *de novo* assembly and reads mapping-based methods.  
360 This study demonstrates the advantage of multi-species comparative analysis that the  
361 cultivated rice genome alone may not adequately represent the genomic diversity of  
362 whole rice species' gene pool. We show that a great number of dispensable genes were  
363 functionally enriched in reproductive process, possibly forming the genetic basis of a  
364 rapid evolution of mating and reproductive systems among the three rice species.

365 We catalogued a large data set comprising millions of genomic variants for cultivated and  
366 wild rice, of which large-effect genomic variants, including SNPs, InDels or SVs causing  
367 stop codon gain or loss and frameshift, CNV and PAVs, may affect a number of  
368 functionally important genes. These sequence variants that may associate with agronomic

369 phenotypes or QTLs of agronomic traits will be useful in improving rice cultivars, in  
370 which rare alleles may be mined and functionally validated. They will also serve as dense  
371 molecular markers to assess new allelic combinations for marker-assisted mapping of  
372 agriculturally important traits in rice breeding programs.

373 Genome-wide structural variations are hypothesized to drive important phenotypic  
374 variation within a species, and a number of CNVs and PAVs in R-genes across the species  
375 have been extensively documented<sup>36-39</sup>. In this study, the multi-species comparative  
376 analysis showed that a large number of candidate genes affected by CNVs associate with  
377 the adaptation to various abiotic and biotic stresses, flower development, flowering time  
378 and reproduction. We also captured lots of RUF-specific and NIV-specific PAVs that  
379 represent an important portion of the dispensable genome and affect genes significantly  
380 enriched in the disease resistance. Such novel genes and/or alleles possibly reflect  
381 important genetic materials from wild rice to adapt to diverse natural habitats, which may  
382 be exploited to enhance increased resilience to climate variability in cultivated rice.

383 Our analysis shows an accelerated evolution of rice gene families, a considerable  
384 portion of which were *de novo* generated and/or experienced fast lineage-specific  
385 expansions and contractions with significantly functional enrichment associated with  
386 physiological changes, phenotypic diversification and environmental adaptation from  
387 their common ancestor during the past 1.5 Myr. A large number of genes associated with  
388 the formation of reproduction isolation, such as the recognition of pollen and male  
389 sterility, were differently amplified, suggesting that the accelerated evolution of these  
390 gene families may have largely driven the variation and evolution of mating system  
391 among Asian cultivated rice and its two immediate wild progenitors. Compared with the  
392 perennial wild rice (RUF) the two annual rice species (SAT and NIV) showed a *de novo*  
393 generation and/or amplification of gene families significantly enriched in photosynthesis  
394 processes, possibly resulting in the observed flowering-time phenotypic variation. Our  
395 analysis showed that disease-resistance genes have been significantly contracted in NIV  
396 but amplified in SAT and RUF during the past 1.5 Myr. The expansion of this type of  
397 genes in RUF suggests that selection pressures in response to pathogenic challenge  
398 potentiated adaptations to the diverse habitats in Asia and Australia. They provide a large  
399 number of disease resistance candidate loci for further functional genomic studies and

400 rice breeding efforts.

401 We identified thousands of candidate genes that may have been under positive  
402 selection in at least one of the three rice species (SAT, RUF and NIV) during the process  
403 of speciation. Functional enrichment analysis further suggests that they are mainly  
404 involved in flower development and response to biotic- and abiotic stresses that are  
405 expected to show signatures of adaptive evolution in changeable environments. We  
406 detected the largest number of PSGs occurred in the annual wild rice (NIV) as a result of  
407 strong selection pressure, which were significantly over-represented in functional  
408 categories related to flower development, ripening, pollination, reproduction and  
409 response to extracellular stimulus. Our results indicate that natural selection may serve as  
410 crucial forces to drive a rapid evolution of mating and reproductive systems of these three  
411 closely related rice species inhabiting on distinctive natural habitats. Further efforts will  
412 be required to perform experiments of functional genomics to seek evidence about how  
413 these genes genetically control environmental adaptation and/or phenotypic alterations.

414 A large collection of genomic variation and increased knowledge of gene and  
415 genome evolution among Asian cultivated rice and its wild progenitors have made a solid  
416 foundation for searching novel gene sources from wild rice germplasm. The pan-genome  
417 of these three rice species could be better resolved by sequencing extra rice genomes and  
418 improving individual genomes through the recent progress in SMRT sequencing  
419 technology. These advances would also enable a precise detection of small-scale  
420 structural variants as well as large-scale inversion and translocation events. Considering  
421 quick extinction and threatened status of the *O. rufipogon* populations in nature due to  
422 severe deforestation in tropical and subtropical regions<sup>10</sup>, it is also our deep hope that the  
423 genome assembly of this wild rice species and a large data set of genomic variation will  
424 offer valuable resources to help efficient conservation of this precious wild rice species.

425

## 426 **Methods**

427 **DNA and RNA extraction, library construction and sequencing.** An individual plant  
428 of *Oryza rufipogon* was collected from Yuanjiang County, Yunnan Province, China. Fresh  
429 and healthy leaves were harvested and used either directly for the isolation of nuclei or  
430 immediately frozen in liquid nitrogen prior to DNA extraction. All collected samples



431 were eventually stored at  $-80^{\circ}\text{C}$  in the laboratory after collections. High-quality genomic  
432 DNA was extracted from leaves using a modified CTAB method<sup>40</sup>. The quantity and  
433 quality of the extracted DNA were examined using a NanoDrop D-1000  
434 spectrophotometer (NanoDrop Technologies, Wilmington, DE) and electrophoresis on a  
435 0.8% agarose gel, respectively. Single-molecule long reads from the PacBio RS II  
436 platform (Pacific Biosciences, USA) were used to assist the subsequent *de novo* genome  
437 assembly. In brief, 20  $\mu\text{g}$  of sheared DNA was used to construct three SMRT Bell  
438 libraries with an insert size of 20 kb. The libraries were then sequenced in ten  
439 single-molecule real time DNA sequencing cells using the P6 polymerase/C4 chemistry  
440 combination, and a data collection time of 240 min per cell. A  $10\times$  Genomics library  
441 was prepared using the GemCode Instrument and sequenced on the Illumina NovaSeq  
442 platform. The Hi-C library was constructed according to a published method<sup>41</sup>. Nuclear  
443 DNA was cross-linked *in situ*, and then cut with restriction enzyme. The sticky ends of  
444 these fragments were biotinylated and then ligated to each other. After ligation, the  
445 biotinylated fragments were enriched and sheared again for the preparation of sequencing  
446 library. Finally, the library was sequenced on Illumina HiSeq X Ten platform. Besides,  
447 we constructed the four libraries for 30-d-roots, 30-d-shoots, panicles at booting stage  
448 and flag leaves at booting stage, which were sequenced on Illumina platform and *de novo*  
449 assembled<sup>42</sup>.

450

451 ***De novo* genome assembly and quality assessment.** The assembly of PacBio long reads  
452 was performed using FALCON (version 0.3.0)<sup>17</sup> with the following parameters:  
453 genome\_size = 380000000, seed\_coverage = 30, length\_cutoff\_pr = 5000, and max\_diff  
454 = 100, max\_cov = 100. This consisted of six steps involving (1) raw reads overlapping;  
455 (2) pre-assembly and error correction; (3) overlapping detection of the error-corrected  
456 reads; (4) overlap filtering; (5) constructing graph; and (6) constructing contig. These  
457 processes produced the initial contigs. The assembly was then phased using  
458 FALCON-Unzip<sup>17</sup> with default parameters. Two subsets of contigs were generated,  
459 including the primary contigs (p-contigs) and the haplotigs, which represent divergent  
460 haplotypes in the genome. The assemblies were aligned to the NCBI nonredundant  
461 nucleotide (nt) database to remove potential contamination from microorganisms using

462 BLASTN. Contigs with more than 90% length similar to bacterial sequences were  
463 removed. Both p-contigs and haplotigs were polished as follows: firstly, quiver in SMRT  
464 Analysis (version 2.3.0)<sup>43</sup> was used for genome polishing using PacBio data with a  
465 minimum subread length = 3000 bp and minimum polymerase read quality = 0.8. Next,  
466 the Illumina data from short libraries ( $\leq 500$  bp) were aligned to the polished assembly  
467 using BWA (version 0.7.15)<sup>44</sup> with default parameters, and then, Pilon (version 1.18)<sup>45</sup>  
468 was used for sequence assembly refinement based upon these alignments. The parameters  
469 for pilon were modified as followed: --flank 7, --K 49, and --mindepth 15. Only the  
470 primary contigs were used for further scaffolding. To link these contigs into scaffolds, 10  
471  $\times$  Genomics data were first mapped to the assembly using BWA-MEM<sup>46</sup>, the resulting  
472 files were sorted and merged into one BAM file using samtools (version 1.9.0)<sup>47</sup>. The  
473 barcoding information contained in 10x linked reads was used by fragScaff<sup>48</sup>. The 10X  
474 Genomics scaffolds were further scaffolded using Hi-C data. Briefly, Hi-C read pairs  
475 were aligned to the scaffolds using BWA MEM algorithm. Then Lachesis<sup>18</sup> was used to  
476 assign the orientation and order of each sequence with the cluster number set to 12 and  
477 other parameters as default. Manual review and refinement were performed to remove the  
478 potential errors. The gaps distributed among the pseudo-chromosome were filled with the  
479 PacBio raw reads using PBJelly2<sup>19</sup> with parameter settings “-minMatch 8 -minPctIdentity  
480 70 -bestn 1 -nCandidates 20 -maxScore -500 -nproc 10 -noSplitSubreads”. The assembly  
481 was subject to two rounds of Pilon (version 1.18)<sup>45</sup> polishing to remove the sequencing  
482 errors.

483 Haplotype variation was detected using MUMER package (version 3.23)<sup>21</sup>. The  
484 error-free haplotigs were aligned to the final assembly using nucmer (version 3.23) with  
485 the parameter: -maxmatch -l 100 -c 500. The program show-snp in the MUMER package  
486 was used to identify the SNPs and indels with the options -Clr -x 1 -T. A homemade  
487 script was used to convert the output into vcf format. Variants with a length of  $\leq 10$  bp  
488 were identified as small variants. Variants larger than 10 bp were identified using  
489 Assemblytics<sup>22</sup>.

490 Four approaches were used to evaluate the quality of *O. rufipogon* genome assembly.  
491 First, we mapped clean sequencing reads ( $\sim 87\times$ ) from short-insert size libraries back to  
492 the assembly using BWA (version 0.7.15)<sup>44</sup> with default parameters. Second, All genomic

493 and protein sequences publicly available in NCBI database (as of January, 2018) were  
494 downloaded and aligned against the genome assembly using GMAP (version  
495 2014-10-22)<sup>49</sup> and genBlastA (version 1.0.1)<sup>50</sup>, respectively. Third, RNA sequencing  
496 reads generated in this study were assembled into transcripts using Trinity (version  
497 v2.0.6)<sup>51</sup> with the default parameters except that the min\_kmer\_cov option was 2, which  
498 were then aligned back to our genome assembly using GMAP (version 2014-10-22)<sup>49</sup>.  
499 Finally, the completeness of the assembly was assessed with benchmarking universal  
500 single-copy orthologs (BUSCO)<sup>23</sup> collected from Embryophyta lineage.

501

502 **Genome annotation.** Repetitive sequences of *O. rufipogon* genome assembly were  
503 masked prior to gene prediction. A combined strategy that integrates *ab initio*, protein and  
504 EST evidences were adopted to predict the protein-coding genes of *O. rufipogon*.  
505 Augustus (version 3.0.3)<sup>52</sup>, GlimmerHMM (version 3.0.3)<sup>53</sup> and GeneMarkHMM  
506 (version 3.47)<sup>54</sup> were used to detect the potential gene coding regions within *O. rufipogon*  
507 genome. The protein sequences from *O. sativa* ssp. *japonica* cv. *Nipponbare*, *O. nivara*,  
508 *O. glaberrima*, *O. barthii*, *O. glumaepatula*, *O. longistaminata*, *O. meridionalis*, *O.*  
509 *brachyantha*, *Zea mays*, *Sorghum bicolor*, and *Brachypodium distachyon* were aligned to  
510 *O. rufipogon* genome assembly using GenBlastA (version 1.0.1)<sup>50</sup> and further refined by  
511 GeneWise (version 2.2.0)<sup>55</sup>. RNA-seq reads were first assembled into transcripts using  
512 Trinity (version 2.0.6)<sup>51</sup>, and then aligned to the genome assembly using PASA (Program  
513 to Assemble Spliced Alignments)<sup>56</sup> to determine the potential gene structures.  
514 EVIDENCEModeler (EVM)<sup>57</sup> was used to combine all the predicted results from *ab initio*,  
515 protein and EST evidences into consensus gene predictions. We filtered out gene models  
516 with their peptide lengths  $\leq 50$ aa and/or harboring stop codons to obtain the final gene  
517 predictions of the *O. rufipogon* genome. We aligned the protein sequences of *O. sativa*  
518 ssp. *japonica* cv. *Nipponbare* and the RNA-seq data of *O. rufipogon* generated in this  
519 study to assess the quality of gene prediction. Putative functions of the predicted genes  
520 were assigned using InterProScan (version 5.3)<sup>58</sup>. PFAM domains and Gene Ontology  
521 IDs for each gene were directly retrieved from the corresponding InterPro entries.

522 Five types of noncoding RNA genes, including miRNA, tRNA, rRNA, snoRNA and  
523 snRNA genes, were predicted using *de novo* and/or homology search methods<sup>16</sup>.

524 Transposable element (TE) were annotated by integrating RepeatMasker  
525 ([www.repeatmasker.org](http://www.repeatmasker.org)), LTR\_STRUCTURE<sup>59</sup>, RECON<sup>60</sup>, and LTR\_Finder<sup>61</sup>. Simple  
526 sequence repeat (SSR) within *O. rufipogon* genome was identified using microsatellite  
527 identification tool (MISA)<sup>62</sup>. The minimum numbers of SSR motifs were 12, 6, 4, 3, 3  
528 and 3 for mono-, di-, tri-, tetra-, penta- and hexa-nucleotides, respectively.

529

530 **Gene family clustering and evolutionary analyses.** OrthoMCL pipeline (version  
531 2.0.9)<sup>63</sup> was used to identify gene families among *O. rufipogon*, *O. sativa*, and *O. nivara*.  
532 First, protein sequences of *O. sativa* and *O. nivara* were separately downloaded from  
533 MSU Rice Genome Annotation Project Database (<http://rice.plantbiology.msu.edu>) and  
534 *Oryza* AA Genomes Database<sup>16</sup>. For genes with alternative splicing, only the longest  
535 isoforms were used. Second, the filtered protein sequences from these three species were  
536 compared using all-vs-all Blastp with an E-value of 1E-5. Finally, the gene families  
537 among *O. rufipogon*, *O. sativa* and *O. nivara* were clustered using a Markov cluster  
538 algorithm (MCL) with an inflation parameter of 1.5.

539 According to the presence and absence of genes for a given species, the  
540 species-specific gene families were retrieved and classified. An update version of CAFE  
541 (version 3.1)<sup>64</sup> implemented with the likelihood model was used to examine the dynamic  
542 evolution of gene families (expansions/contractions). Functional enrichment analysis for  
543 genes with expansion, contraction or species-specific was performed using Fisher's exact  
544 test with false discovery rate (FDR) corrections. PFAM domains or GO terms for each  
545 gene used in functional enrichment analyses were directly extracted from the  
546 InterproScan entries.

547

548 **Phylogenetic analyses.** The orthologous and/or closely paralogous gene families among  
549 *O. rufipogon*, *O. sativa*, *O. nivara* and *O. meridionalis* were constructed using  
550 OrthoMCL pipeline (version 2.0.9)<sup>63</sup>. For these gene families, only those with exactly  
551 one copy within each species were retrieved and defined as conserved single-copy gene  
552 families for subsequent phylogenetic tree construction. RAxML package (version  
553 8.1.13)<sup>65</sup> was used to resolve the phylogenetic relationships among these four rice species.  
554 Briefly, the coding sequences from the identified single-copy gene families were multiply

555 aligned using MUSCLE (version 3.8.31)<sup>66</sup> and concatenated to a super gene sequence for  
556 phylogenetic analyses. All alignments were further trimmed using TrimAl (version 1.4)<sup>67</sup>  
557 with the ‘-nogaps’ option. The JmodelTest (version 2.1.7)<sup>68</sup> was used to determine the  
558 best substitution models for phylogenetic reconstruction. Phylogenetic tree among *O.*  
559 *rufipogon*, *O. sativa*, *O. nivara* and *O. meridionalis* was finally constructed using  
560 RAxML package (version 8.1.13)<sup>65</sup> based on the GTR+GAMMA model using *O.*  
561 *meridionalis* as an outgroup. Bootstrap support values were calculated from 1,000  
562 iterations. Divergence times among these species were estimated using the “*mcmctree*”  
563 program implemented in the PAML package<sup>69</sup>.

564

565 **R-gene identification and classification.** Identification of *R*-genes within *O. rufipogon*  
566 genome was performed using a reiterative method<sup>16</sup>. Briefly, the protein sequences of *O.*  
567 *rufipogon* were first aligned against the raw Hidden Markov Model (HMM) of NB-ARC  
568 family (PF00931) using HMMER (version 3.1b1)<sup>70</sup> with default parameters. High-quality  
569 hits with an E-value of  $\leq 1E-60$  were retrieved and self-aligned using MUSCLE (version  
570 3.8.31)<sup>66</sup> to construct the *O. rufipogon*-specific NBS HMMs. Based on this *O.*  
571 *rufipogon*-specific HMMs, scanning the whole *O. rufipogon* proteome was conducted  
572 again and genes with the *O. rufipogon*-specific PF00931 domain were defined as *R*-genes.  
573 The identified *R*-genes were further classified by TIR domain (PF01582) and LRR  
574 domain (PF00560, PF07725, PF12799, PF13306, PF13516, PF13504 and PF13855).  
575 These two types of PFAM domains could be detected using HMMER (version 3.1b1)<sup>70</sup>.  
576 CC domains within *R*-genes were identified using ncoils<sup>71</sup> with the default parameters.

577

578 **Multi-species comparative analysis.** We performed a multi-species comparative analysis  
579 of the RUF, NIV and SAT genomes using a similar method as described in the building of  
580 the soybean pan-genome<sup>37</sup>. Firstly, we separately aligned the RUF and NIV genomes  
581 against the SAT genome using “*Nucmer*” program (version 3.1) implemented in the  
582 MUMmer package (version 3.23)<sup>21</sup> with the parameters of “-maxmatch -c 100 -l 40”. We  
583 then mapped the NIV genome onto the RUF genome using MUMmer package with the  
584 parameters of “-maxmatch -c 100 -l 40”. Secondly, we processed the above-generated  
585 results from whole genome alignments (WGA) among the RUF, NIV and SAT genomes

586 using program of “*dnadiff*” (version 1.3) implemented in the MUMmer package<sup>21</sup> to  
587 obtain more high-quality alignment results. Finally, we performed a tri-genome  
588 comparisons among the RUF, NIV and SAT genomes based on their pairwise WGA  
589 results using a customized perl script. The core-genome was defined as the most  
590 conserved genomic regions shared among the RUF, NIV and SAT genomes.

591

592 **SNP and InDel identification.** Homozygous SNPs and small InDels of the RUF and  
593 NIV genomes were directly extracted from the previous one-to-one whole genome  
594 alignments (WGA) using the SAT genome as a reference sequence, respectively. We then  
595 separately detected SNPs and small InDels of the RUF and NIV genomes using GATK  
596 (version 3.5)<sup>72</sup> based on the short read alignment results against their own genomes. We  
597 combined the results from both WGA and GATK methods to obtain the final datasets of  
598 genomic variation. We generated the SNPs and small InDels of the SAT genome based on  
599 its short reads alignment result. Putative functional effects of SNPs and InDels were  
600 annotated using the ANNOVAR package<sup>73</sup>. SNPs/InDels causing stop codon gain, stop  
601 codon loss and frameshift were defined as large-effect mutations.

602

603 **Copy Number Variation (CNV) identification.** We identified the CNVs between RUF  
604 and SAT as well as NIV and SAT using CNVnator (version 0.3)<sup>74</sup> based on the read depth.  
605 The parameter used for CNVnator is “-call 100”. The deletions/insertions with minimal  
606 length of 500 bp and read depth less than 1.2 or larger than 1.8 of the mean genomic  
607 depth are deemed as candidate CNVs. A custom script was used to perform CNV  
608 annotation and genes with more than 80% of its exons in CNV region are considered as  
609 candidate genes affected by CNVs.

610

611 **Presence and Absence Variation (PAV) identification.** We characterized genomic  
612 presence and absence variation (PAV) using the same method as described in the soybean  
613 pan-genome analysis<sup>37</sup>. In this study, we defined and assigned four types of PAV: RS10  
614 (presence in RUF but absence in SAT), RS01 (presence in SAT but absence in RUF),  
615 NS10 (presence in NIV but absence in SAT) and NS01 (presence in SAT but absence in  
616 NIV). To identify PAVs between the SAT and RUF genomes, we first extracted the



617 sequences that could not be aligned to the SAT genome. We then realigned them to the  
618 SAT genome and SMRT sequences from the *indica* genome using BLAST<sup>75</sup>, and finally  
619 filtered sequence stretches with an identity larger than 95%. RUF-specific sequences  
620 were obtained after excluding the potential bacterial contamination based on the BLAST  
621 alignment against NT database. Genes with > 50% CDS regions covered by RUF-specific  
622 sequences were defined as RUF-specific genes. Based on the short reads alignment  
623 results, blocks with no mapped reads by RUF were defined as SAT-specific sequences.  
624 Genomic regions with distance less than 500 bp were merged into one block. Genes that  
625 overlapped these blocks with 50% length were considered as SAT-specific sequences.  
626 The same process was used to identify the PAVs between the SAT and NIV genome.

627

628 **Positively Selected Gene (PSG) identification.** We employed the optimized branch-site  
629 model implemented in the PAML package (version 4.4)<sup>69</sup> to estimate the selection  
630 pressures on protein-coding genes from 1:1 high-quality orthologous gene families. We  
631 identified genes showing the positive selection in RUF, NIV and SAT lineage based on  
632 the likelihood ratio test (LTR) *P*-value. Genes with the *P*-value < 0.01 (FDR < 0.05) were  
633 retained and regarded as PSGs.

634

### 635 **Data availability**

636 Raw nucleotide sequence data are available in the NCBI sequence read archive database  
637 (BioProject PRJNA599011) under the accession number SRPXXXXX. The draft genome  
638 has deposited in the NCBI whole-genome shotgun database (BioProject PRJNA599011)  
639 under the submission number XXXXXX (released upon article acceptance).

640

### 641 **References**

- 642 1 Khush, G. S. Origin, dispersal, cultivation and variation of rice. *Plant Mol Biol* **35**,  
643 25-34 (1997).
- 644 2 Cheng, C. *et al.* Polyphyletic origin of cultivated rice: based on the interspersed  
645 pattern of SINES. *Mol Biol Evol* **20**, 67-75 (2003).
- 646 3 Fuller, D. Q. *et al.* Consilience of genetics and archaeobotany in the entangled history  
647 of rice. *Archaeological & Anthropological Sciences* **2**, 115-131 (2010).
- 648 4 Huang, X. *et al.* A map of rice genome variation reveals the origin of cultivated rice.  
649 *Nature* **490**, 497-501 (2012).



- 650 5 Oka, H. I. *Origin of cultivated rice*. (Elsevier Science, 1988).
- 651 6 Kovach, M. J., Sweeney, M. T. & McCouch, S. R. New insights into the history of  
652 rice domestication. *Trends Genet* **23**, 578-587, doi:10.1016/j.tig.2007.08.012 (2007).
- 653 7 Xu, X. *et al.* Resequencing 50 accessions of cultivated and wild rice yields markers  
654 for identifying agronomically important genes. *Nature biotechnology* **30**, 105-111,  
655 doi:10.1038/nbt.2050 (2011).
- 656 8 Morishima, H., Sano, Y. & Oka, H. I. Evolutionary studies in cultivated rice and its  
657 wild relatives. *Oxford Surveys Evol. Biol.* **8**, 135-184 (1992).
- 658 9 Gao, L., Zhang, S., Zhou, Y., Ge, S. & Hong, D. A survey of the current status of wild  
659 rice in China. *Chinese Biodiversity* **48**, 160-166 (1996).
- 660 10 Gao, L. Population structure and conservation genetics of wild rice *Oryza rufipogon*  
661 (Poaceae): a region-wide perspective from microsatellite variation. *Mol Ecol* **13**,  
662 1009-1024, doi:10.1111/j.1365-294X.2004.02108.x (2004).
- 663 11 Barbier, P. Genetic variation and ecotypic differentiation in the wild rice species  
664 *Oryza rufipogon*. I. Population differentiation in life-history traits and isozymic loci.  
665 *Japanese Journal of Genetics* **64**, 259-271 (2006).
- 666 12 Morishima, H. & Barbier, P. Mating system and genetic structure of natural  
667 populations in wild rice *Oryza rufipogon*. *Plant Species Biology* **5**, 31-39 (1990).
- 668 13 Li, X. X. *et al.* Estimation of mating system in natural *Oryza rufipogon* populations  
669 by SSR markers. *Chinese Journal of Rice Science* **24**, 601-607 (2010).
- 670 14 Brar, D. S. & Ramos, J. M. *Wild species of Oryza: a rich reservoir of genetic*  
671 *variability for rice improvement*. (International Rice Research Institute, 2007).
- 672 15 Lin, S. C. & Yuan, L. P. in *Innovative approaches to rice breeding. Selected papers*  
673 *from the 1979 International Rice Research Conference*.
- 674 16 Zhang, Q. J. *et al.* Rapid diversification of five *Oryza* AA genomes associated with  
675 rice adaptation. *Proc Natl Acad Sci U S A* **111**, E4954-4962,  
676 doi:10.1073/pnas.1418307111 (2014).
- 677 17 Chin, C. S., Peluso, P. & Sedlazeck, F. J. Phased diploid genome assembly with  
678 single-molecule real-time sequencing. **13**, 1050-1054, doi:10.1038/nmeth.4035  
679 (2016).
- 680 18 Burton, J. N. *et al.* Chromosome-scale scaffolding of de novo genome assemblies  
681 based on chromatin interactions. *Nature biotechnology* **31**, 1119-1125,  
682 doi:10.1038/nbt.2727 (2013).
- 683 19 English, A. C. *et al.* Mind the gap: upgrading genomes with Pacific Biosciences RS  
684 long-read sequencing technology. *PLoS One* **7**, e47768,  
685 doi:10.1371/journal.pone.0047768 (2012).
- 686 20 Reuscher, S. *et al.* Assembling the genome of the African wild rice *Oryza*  
687 *longistaminata* by exploiting synteny in closely related *Oryza* species. **1**, 162,  
688 doi:10.1038/s42003-018-0171-y (2018).
- 689 21 Kurtz, S. *et al.* Versatile and open software for comparing large genomes. *Genome*  
690 *Biology* **5**, R12 (2004).
- 691 22 Nattestad, M. & Schatz, M. C. Assemblytics: a web analytics tool for the detection of  
692 variants from an assembly. *Bioinformatics (Oxford, England)* **32**, 3021-3023,  
693 doi:10.1093/bioinformatics/btw369 (2016).
- 694 23 Simao, F. A., Waterhouse, R. M., Ioannidis, P., Kriventseva, E. V. & Zdobnov, E. M.  
695 BUSCO: assessing genome assembly and annotation completeness with single-copy

- 696 orthologs. *Bioinformatics (Oxford, England)* **31**, 3210-3212,  
697 doi:10.1093/bioinformatics/btv351 (2015).
- 698 24 Cui, H., Tsuda, K. & Parker, J. E. Effector-triggered immunity: from pathogen  
699 perception to robust defense. *Annu Rev Plant Biol* **66**, 487-511,  
700 doi:10.1146/annurev-arplant-050213-040012 (2015).
- 701 25 Venditti, C. & Pagel, M. Speciation as an active force in promoting genetic evolution.  
702 *Trends Ecol Evol* **25**, 14-20, doi:10.1016/j.tree.2009.06.010 (2010).
- 703 26 Pentony, M. M. *et al.* The Plant Proteome Folding Project: Structure and Positive  
704 Selection in Plant Protein Families. *Genome Biology and Evolution*, *4,3(2012-2-16)* **4**,  
705 360-371 (2012).
- 706 27 IRGSP. The map-based sequence of the rice genome. *Nature* **436**, 793-800,  
707 doi:10.1038/nature03895 (2005).
- 708 28 Project, I. R. G. S. A draft sequence of the rice genome (*Oryza sativa* L. ssp. *indica*).  
709 *Science* **296**, 79-92, doi:10.1126/science.1068037 (2002).
- 710 29 Goff, S. A. *et al.* A draft sequence of the rice genome (*Oryza sativa* L. ssp. *japonica*).  
711 *Science* **296**, 92-100, doi:10.1126/science.1068275 (2002).
- 712 30 Zhang, J. *et al.* Extensive sequence divergence between the reference genomes of two  
713 elite *indica* rice varieties Zhenshan 97 and Minghui 63. *Proc Natl Acad Sci U S A* **113**,  
714 E5163-5171, doi:10.1073/pnas.1611012113 (2016).
- 715 31 Stein, J. C., Yu, Y., Copetti, D., Zwickl, D. J. & Zhang, L. Genomes of 13  
716 domesticated and wild rice relatives highlight genetic conservation, turnover and  
717 innovation across the genus *Oryza*. *Nature genetics* **50**, 285-296,  
718 doi:10.1038/s41588-018-0040-0 (2018).
- 719 32 Tanksley, S. D. & McCouch, S. R. Seed banks and molecular maps: unlocking  
720 genetic potential from the wild. *Science* **277**, 1063-1066 (1997).
- 721 33 Wang, M. *et al.* The genome sequence of African rice (*Oryza glaberrima*) and  
722 evidence for independent domestication. *Nat Genet* **46**, 982-988,  
723 doi:10.1038/ng.3044 (2014).
- 724 34 Zhang, Y. *et al.* Genome and comparative transcriptomics of African wild rice *Oryza*  
725 *longistaminata* provide insights into molecular mechanism of rhizomatousness and  
726 self-incompatibility. *Mol Plant* **8**, 1683-1686, doi:10.1016/j.molp.2015.08.006  
727 (2015).
- 728 35 Zhao, Q. & Feng, Q. Pan-genome analysis highlights the extent of genomic variation  
729 in cultivated and wild rice. **50**, 278-284, doi:10.1038/s41588-018-0041-z (2018).
- 730 36 McHale, L. K. *et al.* Structural variants in the soybean genome localize to clusters of  
731 biotic stress-response genes. *Plant physiology* **159**, 1295-1308,  
732 doi:10.1104/pp.112.194605 (2012).
- 733 37 Li, Y. H. *et al.* De novo assembly of soybean wild relatives for pan-genome analysis  
734 of diversity and agronomic traits. *Nature biotechnology* **32**, 1045-1052,  
735 doi:10.1038/nbt.2979 (2014).
- 736 38 Bayer, P. E. & Golicz, A. A. Variation in abundance of predicted resistance genes in  
737 the Brassica oleracea pangenome. **17**, 789-800, doi:10.1111/pbi.13015 (2019).
- 738 39 Dolatabadian, A. & Bayer, P. E. Characterization of disease resistance genes in the  
739 Brassica napus pangenome reveals significant structural variation.  
740 doi:10.1111/pbi.13262 (2019).
- 741 40 Porebski, S., Bailey, L. G. & Baum, B. R. Modification of a CTAB DNA extraction

- 742 protocol for plants containing high polysaccharide and polyphenol components. *Plant*  
743 *Molecular Biology Reporter* **15**, 8-15 (1997).
- 744 41 Lieberman-Aiden, E. *et al.* Comprehensive mapping of long-range interactions  
745 reveals folding principles of the human genome. *Science* **326**, 289-293,  
746 doi:10.1126/science.1181369 (2009).
- 747 42 Li, X. *et al.* Improved hybrid de novo genome assembly of domesticated apple  
748 (*Malus x domestica*). *Gigascience* **5**, 35 (2016).
- 749 43 Chin, C. S. *et al.* Nonhybrid, finished microbial genome assemblies from long-read  
750 SMRT sequencing data. *Nat Methods* **10**, 563-569, doi:10.1038/nmeth.2474 (2013).
- 751 44 Li, H. & Durbin, R. Fast and accurate short read alignment with Burrows-Wheeler  
752 transform. *Bioinformatics (Oxford, England)* **25**, 1754-1760,  
753 doi:10.1093/bioinformatics/btp324 (2009).
- 754 45 Walker, B. J. *et al.* Pilon: an integrated tool for comprehensive microbial variant  
755 detection and genome assembly improvement. *PLoS One* **9**, e112963,  
756 doi:10.1371/journal.pone.0112963 (2014).
- 757 46 Li, H. Li, H.: Aligning sequence reads, clone sequences and assembly contigs with  
758 BWA-MEM. arXiv (1303.3997). **1303** (2013).
- 759 47 Li, H. *et al.* The Sequence Alignment/Map format and SAMtools. *Bioinformatics*  
760 *(Oxford, England)* **25**, 2078-2079, doi:10.1093/bioinformatics/btp352 (2009).
- 761 48 Adey, A. *et al.* In vitro, long-range sequence information for de novo genome  
762 assembly via transposase contiguity. *Genome Res* **24**, 2041-2049,  
763 doi:10.1101/gr.178319.114 (2014).
- 764 49 Wu, T. D. & Watanabe, C. K. GMAP: a genomic mapping and alignment program for  
765 mRNA and EST sequences. *Bioinformatics (Oxford, England)* **21**, 1859-1875,  
766 doi:10.1093/bioinformatics/bti310 (2005).
- 767 50 She, R., Chu, J. S., Wang, K., Pei, J. & Chen, N. GenBlastA: enabling BLAST to  
768 identify homologous gene sequences. *Genome Res* **19**, 143-149,  
769 doi:10.1101/gr.082081.108 (2009).
- 770 51 Grabherr, M. G. *et al.* Full-length transcriptome assembly from RNA-Seq data  
771 without a reference genome. *Nature biotechnology* **29**, 644-652,  
772 doi:10.1038/nbt.1883 (2011).
- 773 52 Stanke, M., Steinkamp, R., Waack, S. & Morgenstern, B. AUGUSTUS: a web server  
774 for gene finding in eukaryotes. *Nucleic Acids Res* **32**, W309-312,  
775 doi:10.1093/nar/gkh379 (2004).
- 776 53 Majoros, W. H., Pertea, M. & Salzberg, S. L. TigrScan and GlimmerHMM: two open  
777 source *ab initio* eukaryotic gene-finders. *Bioinformatics (Oxford, England)* **20**,  
778 2878-2879, doi:10.1093/bioinformatics/bth315 (2004).
- 779 54 Lukashin, A. V. & Borodovsky, M. GeneMark.hmm: new solutions for gene finding.  
780 *Nucleic Acids Res* **26**, 1107-1115 (1998).
- 781 55 Birney, E., Clamp, M. & Durbin, R. GeneWise and Genomewise. *Genome Res* **14**,  
782 988-995, doi:10.1101/gr.1865504 (2004).
- 783 56 Haas, B. J. *et al.* Improving the Arabidopsis genome annotation using maximal  
784 transcript alignment assemblies. *Nucleic Acids Res* **31**, 5654-5666 (2003).
- 785 57 Haas, B. J. *et al.* Automated eukaryotic gene structure annotation using  
786 EVIDENCEModeler and the Program to Assemble Spliced Alignments. *Genome Biol* **9**,  
787 R7, doi:10.1186/gb-2008-9-1-r7 (2008).

- 788 58 Jones, P. *et al.* InterProScan 5: genome-scale protein function classification.  
789 *Bioinformatics (Oxford, England)* **30**, 1236-1240, doi:10.1093/bioinformatics/btu031  
790 (2014).
- 791 59 McCarthy, E. M. & McDonald, J. F. LTR\_STRUC: a novel search and identification  
792 program for LTR retrotransposons. *Bioinformatics (Oxford, England)* **19**, 362-367  
793 (2003).
- 794 60 Bao, Z. & Eddy, S. R. Automated *de novo* identification of repeat sequence families  
795 in sequenced genomes. *Genome Res* **12**, 1269-1276, doi:10.1101/gr.88502 (2002).
- 796 61 Xu, Z. & Wang, H. LTR\_FINDER: an efficient tool for the prediction of full-length  
797 LTR retrotransposons. *Nucleic Acids Res* **35**, W265-268, doi:10.1093/nar/gkm286  
798 (2007).
- 799 62 Thiel, T., Michalek, W., Varshney, R. K. & Graner, A. Exploiting EST databases for  
800 the development and characterization of gene-derived SSR-markers in barley  
801 (*Hordeum vulgare* L.). *Theor Appl Genet* **106**, 411-422,  
802 doi:10.1007/s00122-002-1031-0 (2003).
- 803 63 Li, L., Stoeckert, C. J., Jr. & Roos, D. S. OrthoMCL: identification of ortholog groups  
804 for eukaryotic genomes. *Genome Res* **13**, 2178-2189, doi:10.1101/gr.1224503 (2003).
- 805 64 Han, M. V., Thomas, G. W., Lugo-Martinez, J. & Hahn, M. W. Estimating gene gain  
806 and loss rates in the presence of error in genome assembly and annotation using  
807 CAFE 3. *Molecular Biology and Evolution* **30**, 1987-1997 (2013).
- 808 65 Stamatakis, A. RAxML-VI-HPC: maximum likelihood-based phylogenetic analyses  
809 with thousands of taxa and mixed models. *Bioinformatics (Oxford, England)* **22**,  
810 2688-2690, doi:10.1093/bioinformatics/btl446 (2006).
- 811 66 Edgar, R. C. MUSCLE: multiple sequence alignment with high accuracy and high  
812 throughput. *Nucleic Acids Res* **32**, 1792-1797, doi:10.1093/nar/gkh340 (2004).
- 813 67 Capella-Gutiérrez, S., Silla-Martínez, J. M. & Gabaldón, T. trimAl: a tool for  
814 automated alignment trimming in large-scale phylogenetic analyses. *Bioinformatics*  
815 *(Oxford, England)* **25**, 1972-1973 (2009).
- 816 68 Darriba, D., Taboada, G. L., Doallo, R. & Posada, D. jModelTest 2: more models,  
817 new heuristics and parallel computing. *Nat Methods* **9**, 772, doi:10.1038/nmeth.2109  
818 (2012).
- 819 69 Yang, Z. PAML 4: phylogenetic analysis by maximum likelihood. *Mol Biol Evol* **24**,  
820 1586-1591, doi:10.1093/molbev/msm088 (2007).
- 821 70 Finn, R. D., Clements, J. & Eddy, S. R. HMMER web server: interactive sequence  
822 similarity searching. *Nucleic Acids Res* **39**, W29-37, doi:10.1093/nar/gkr367 (2011).
- 823 71 Lupas, A., Van Dyke, M. & Stock, J. Predicting coiled coils from protein sequences.  
824 *Science* **252**, 1162-1164, doi:10.1126/science.252.5009.1162 (1991).
- 825 72 McKenna, A. *et al.* The Genome Analysis Toolkit: a MapReduce framework for  
826 analyzing next-generation DNA sequencing data. *Genome Res* **20**, 1297-1303,  
827 doi:10.1101/gr.107524.110 (2010).
- 828 73 Wang, K., Li, M. & Hakonarson, H. ANNOVAR: functional annotation of genetic  
829 variants from high-throughput sequencing data. *Nucleic Acids Res* **38**, e164,  
830 doi:10.1093/nar/gkq603 (2010).
- 831 74 Abyzov, A., Urban, A. E., Snyder, M. & Gerstein, M. CNVnator: an approach to  
832 discover, genotype, and characterize typical and atypical CNVs from family and  
833 population genome sequencing. *Genome Res* **21**, 974-984, doi:10.1101/gr.114876.110

834 (2011).  
835 75 Altschul, S. F., Gish, W., Miller, W., Myers, E. W. & Lipman, D. J. Basic local  
836 alignment search tool. *J Mol Biol* **215**, 403-410, doi:10.1016/s0022-2836(05)80360-2  
837 (1990).  
838

### 839 **Acknowledgements**

840 This work was supported by the Key Project of the Natural Science Foundation of  
841 Yunnan Province (201401PC00397), the start-up grant from South China Agricultural  
842 University and Yunnan Innovation Team Project (2015FA030) (to L. G.), Natural Science  
843 Foundation of China (31501025)(to Y. L.), and Natural Science Foundation of China  
844 (31601045) (to Q. Z.).

845

### 846 **Author contributions**

847 L.Z.G. conceived and designed the study; C.S., G.H., X.G.Z., T.Z., D.Z. and Y.Z.  
848 contributed to the sample preparation and genome sequencing; K.L. and W.K.J.  
849 performed genome assembly; Y.T. and H.H. performed flow cytometry experiments;  
850 W.L. and Y.Z. performed genome annotation; Y.H., E.H.X., W.S.H., Q.J.Z., Y.L.L., Y.L.,  
851 Y.C.N., J.Y. and C.W.G. performed data analysis; L.Z.G. and W.L. wrote the paper;  
852 L.Z.G. revised the paper.

853

854 **Competing interests:** The authors declare no competing interests.

855



856 **Tables**

857

858 **Table 1. Summary of the genome assembly and annotation of *O. rufipogon*.**

859

---

| <b>Assembly</b>                |          |
|--------------------------------|----------|
| SMRT Sequencing Depth (×)      | 102.3    |
| 10X Sequencing Depth (×)       | 103.0    |
| Hi-C Sequencing Depth (×)      | 269.0    |
| Estimated genome size (Mb)     | 388.0    |
| Assembled sequence length (Mb) | 380.51   |
| Scaffold N50 (Mb)              | 30.20    |
| Contig N50 (Kb)                | 1,096.43 |

---

| <b>Annotation</b>                        |        |
|------------------------------------------|--------|
| Number of predicted protein-coding genes | 34,830 |
| Average gene length (bp)                 | 2,921  |
| tRNAs                                    | 637    |
| rRNAs                                    | 1,085  |
| snoRNAs                                  | 442    |
| snRNAs                                   | 117    |
| miRNAs                                   | 245    |
| Transposable elements (%)                | 44.14  |

---

860

861

862

## 863 **Figure legends**

864

865 **Figure 1. Genome feature and genomic variation of *O. rufipogon*.** The outer circle  
866 represents the 12 chromosomes of *O. sativa*, along with the gene density  
867 (non-overlapping, window size = 500 Kb). Moving inward, the four circles with line plot  
868 refer to the SNP, InDel, SV, and CNV distribution, respectively (non-overlapping,  
869 window size = 500 Kb). *O. rufipogon* is indicated in blue, while *O. nivara* is represented  
870 in red. The inner two circles plotted with heat map display the sequence similarities of  
871 orthologous gene pairs between *O. sativa* and *O. rufipogon* (blue), and between *O. sativa*  
872 and *O. nivara* (red).

873

874 **Figure 2. Multi-species comparative analysis and genomic variation among *O.***  
875 ***rufipogon*, *O. nivara* and *O. sativa*.** (A) Increase and decrease of gene numbers in pan-  
876 and core- genome. (B) Sequence composition of the pan-genome among RUF, NIV and  
877 SAT. (C) Exemplar patterns of single nucleotide polymorphisms on rice Chromosome 1  
878 (see **Supplementary Figure 9** for the other 11 chromosomes). (D) Number of *R*-genes  
879 and MADS-box genes affected by CNVs. (E) Functional enrichment of genes affected by  
880 PAVs. The top 10 PFAM functional categories for each PAV type are shown. \* indicates  
881 the significance of FDR < 0.05, while \*\* means FDR < 0.01. PAV types are represented  
882 in a customized format, of which RS10 indicates that a PAV is present in RUF but absent  
883 in SAT, NS10 denotes that a PAV is present in NIV but absent in SAT, RS01 shows that a  
884 PAV is absent in RUF but present in SAT, and NS01 signifies that a PAV is absent in RUF  
885 but present in SAT.

886

887 **Figure 3. Dynamic evolution of gene families.** (A) Venn diagram shows the shared and  
888 unique gene families among RUF, NIV and SAT. (B) Expansion and contraction of gene  
889 families among RUF, NIV, SAT and MER. Phylogenetic tree was constructed based on  
890 10,206 high-quality 1:1 single-copy orthologous genes using MER as outgroup. Bar plot  
891 beside or on each branch of the tree represents the number of gene families undergoing  
892 gain (green) or loss (red) events. Lineage-specific and -extinct families are colored in  
893 orange and light blue, respectively. Number at the tree root (23,755) denotes the total



894 number of gene families predicted in the most recent common ancestor (MRCA). The  
895 numerical value below phylogenetic tree shows the estimated divergent time of each node  
896 (MYA; million years ago). (C) Comparisons of disease-resistant genes among RUF, NIV  
897 and SAT.

898

899 **Figure 4. Natural selection on rice genes.** (A) Branch-specific  $\omega$  values of RUF, SAT  
900 and NIV estimated by using PAML. (B) Number of PSGs identified in RUF, SAT and  
901 NIV lineage. (C) Functional enrichment of flower development and biotic stimulus  
902 response-related PSGs compared with whole gene set. (D) Genome-wide distribution of  
903 PSGs. The outer ring represents the 12 rice chromosomes; the four circles from the  
904 perimeter to the center separately refer to the  $dN$ ,  $dS$ , PSGs, and  $dN/dS$  distribution for the  
905 2,053 1:1 orthologous genes. The eighteen genes functionally associated with ripening  
906 (green triangles), flower development (red triangles) and reproduction (blue triangles) are  
907 marked. Black points in the inner circles show the  $dN/dS$  ratios  $< 0.5$ , while green points  
908 indicate  $0.5 \leq dN/dS < 0.8$ , and red points present  $dN/dS \geq 0.8$ .

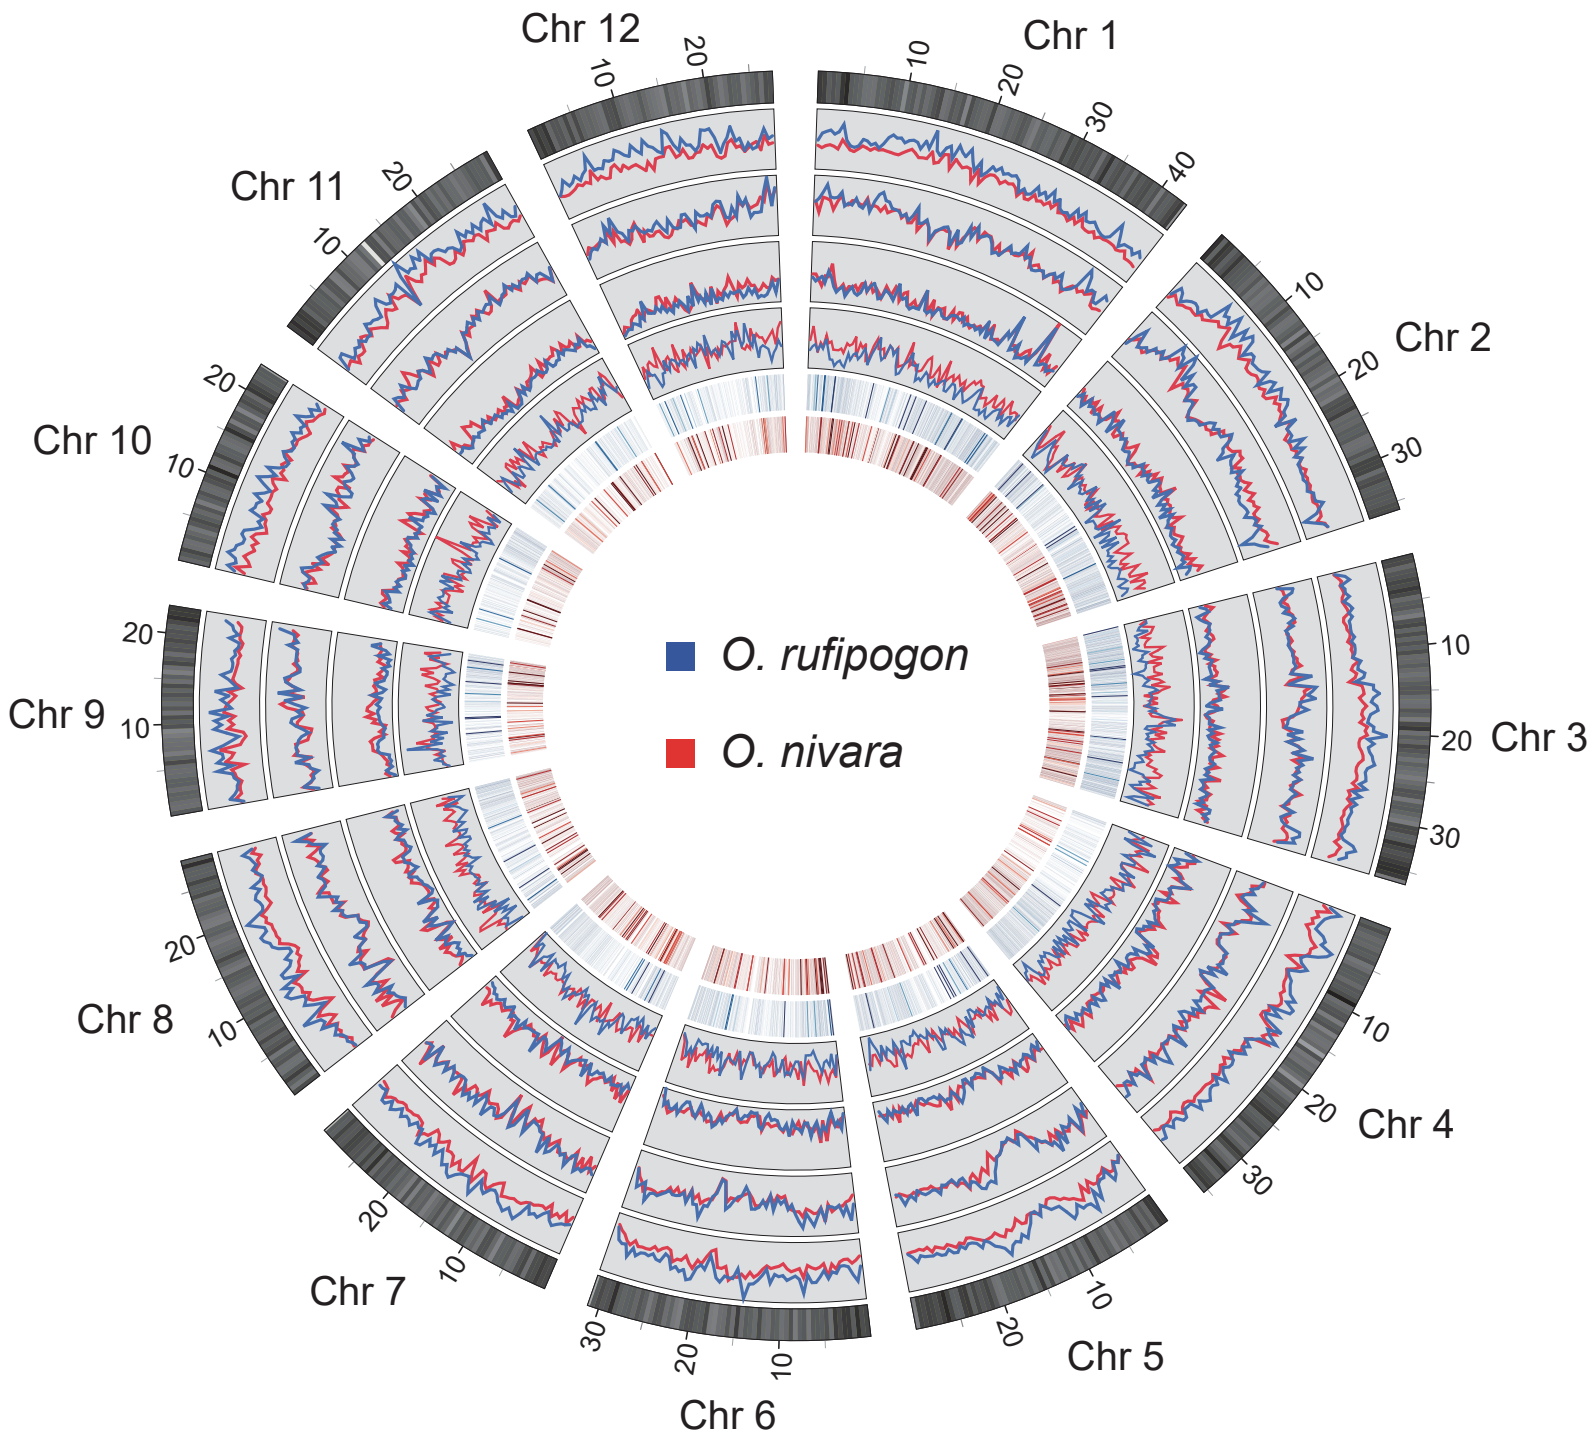

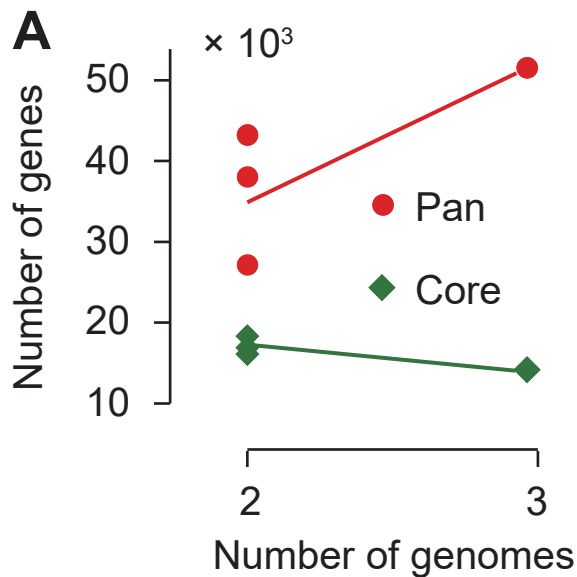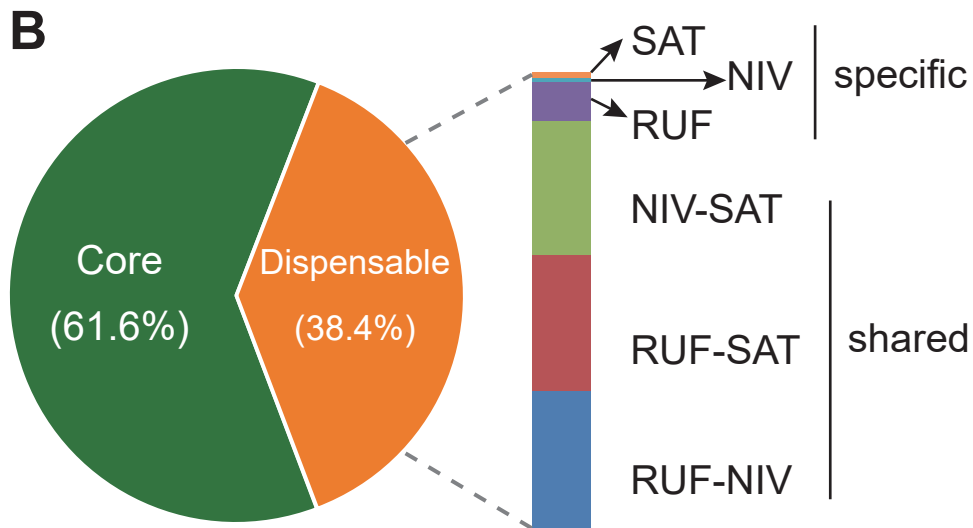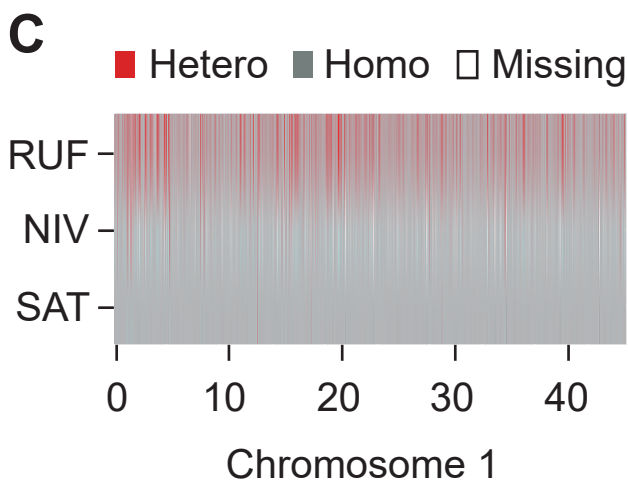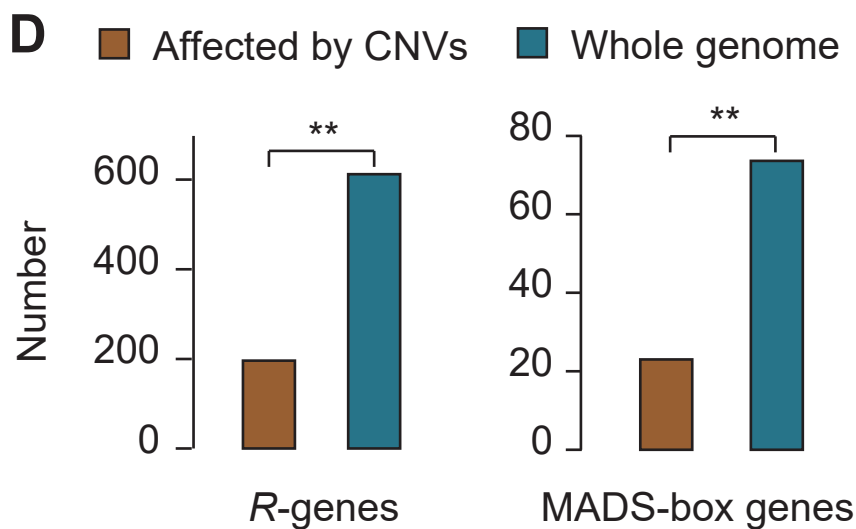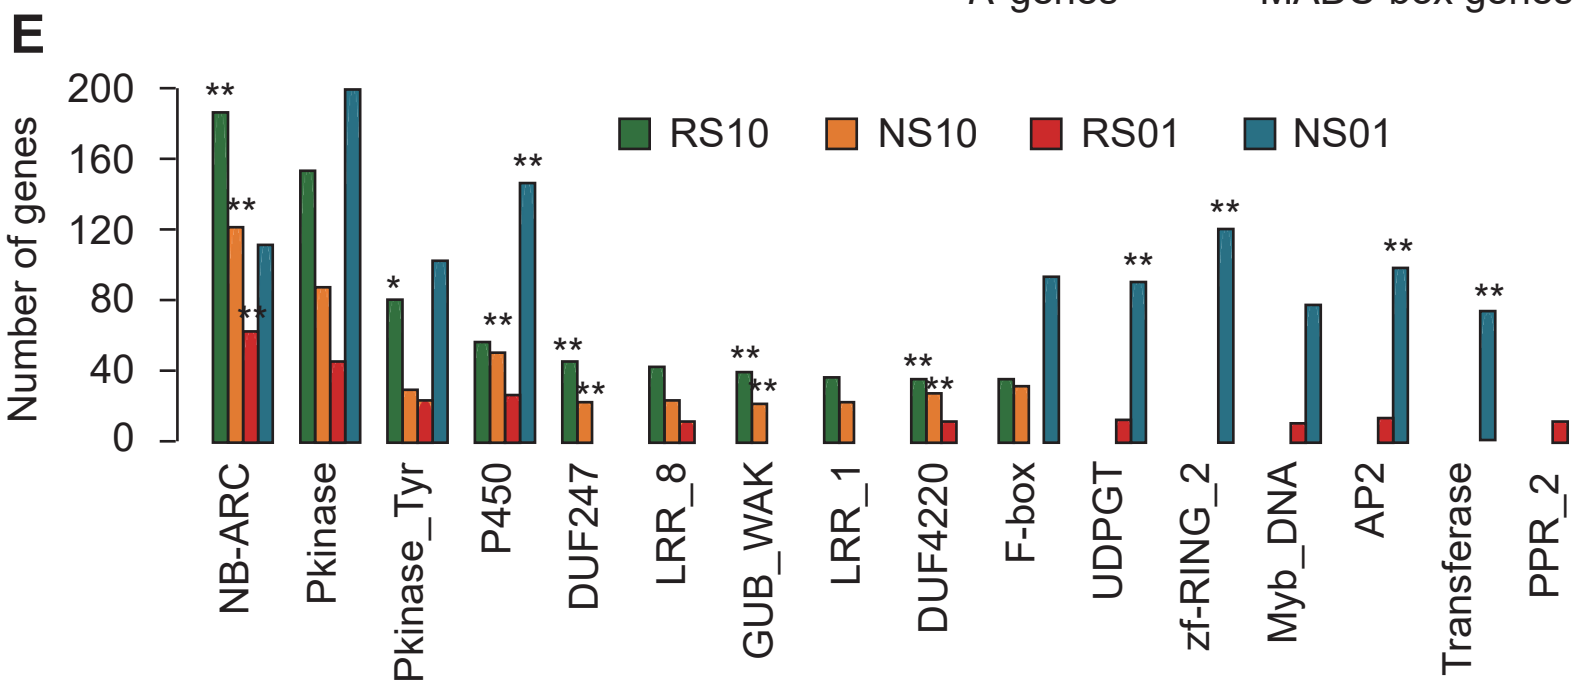

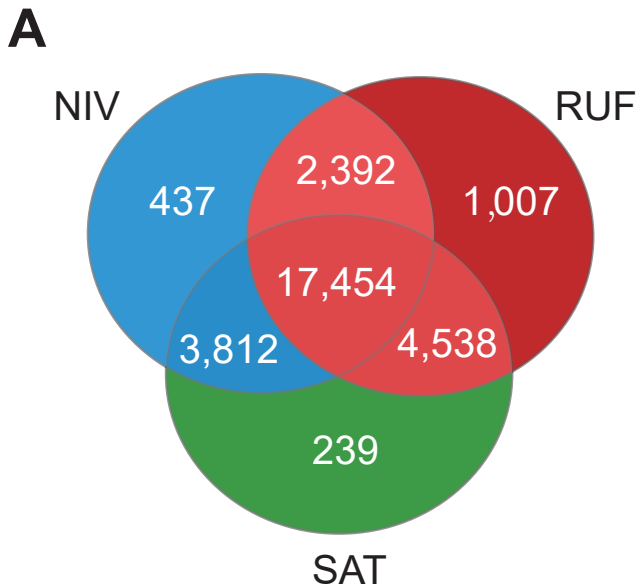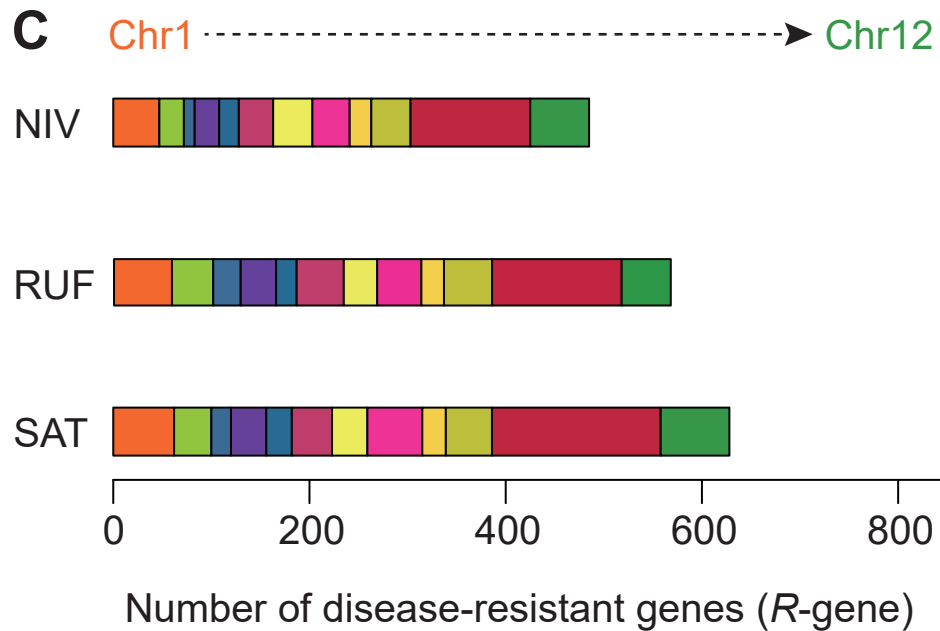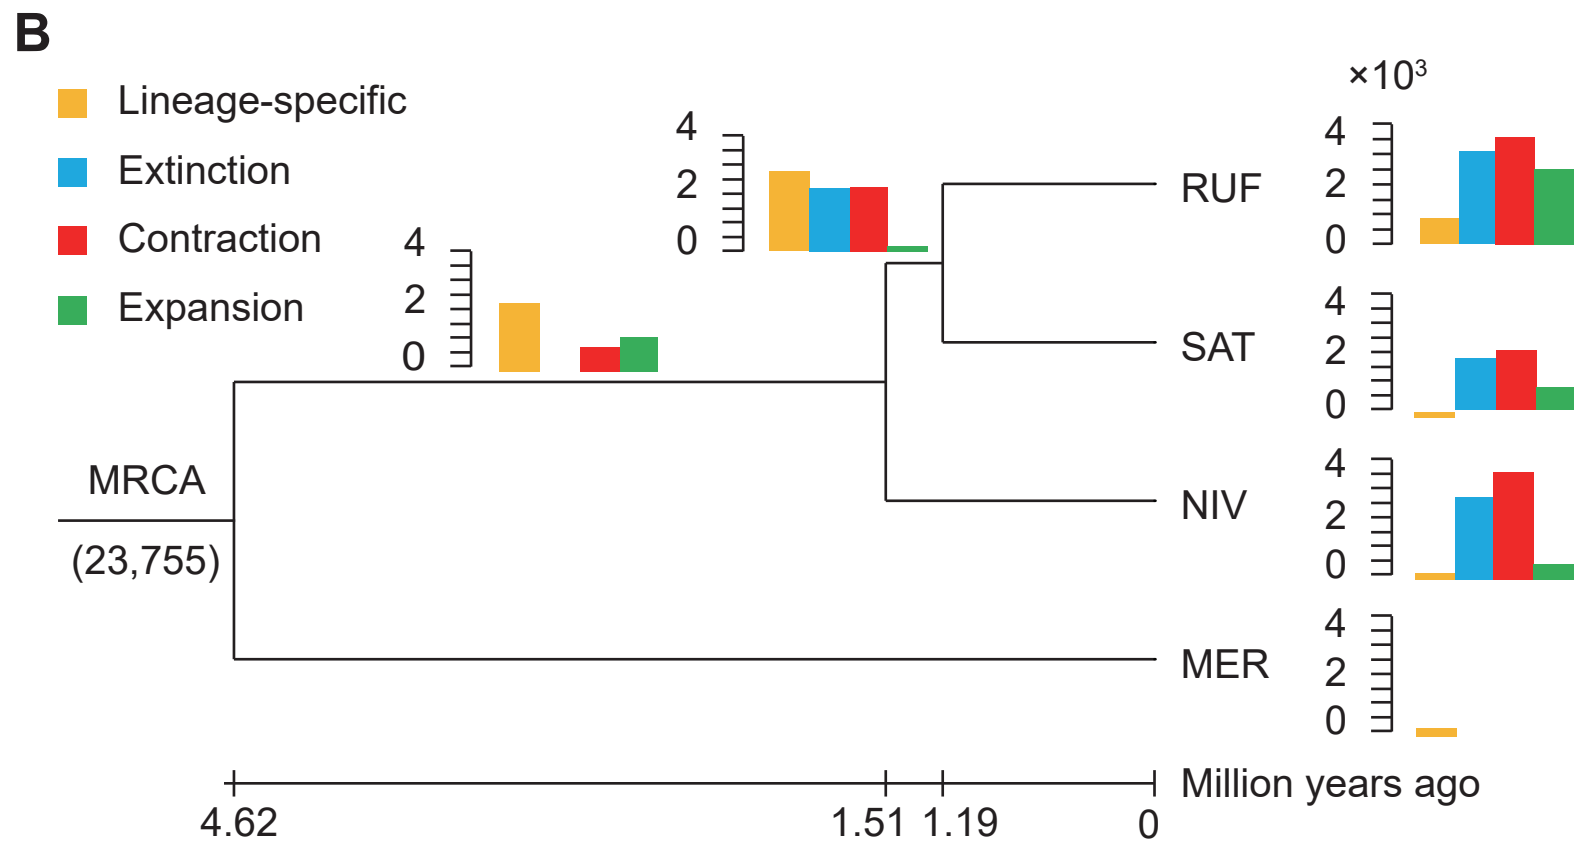

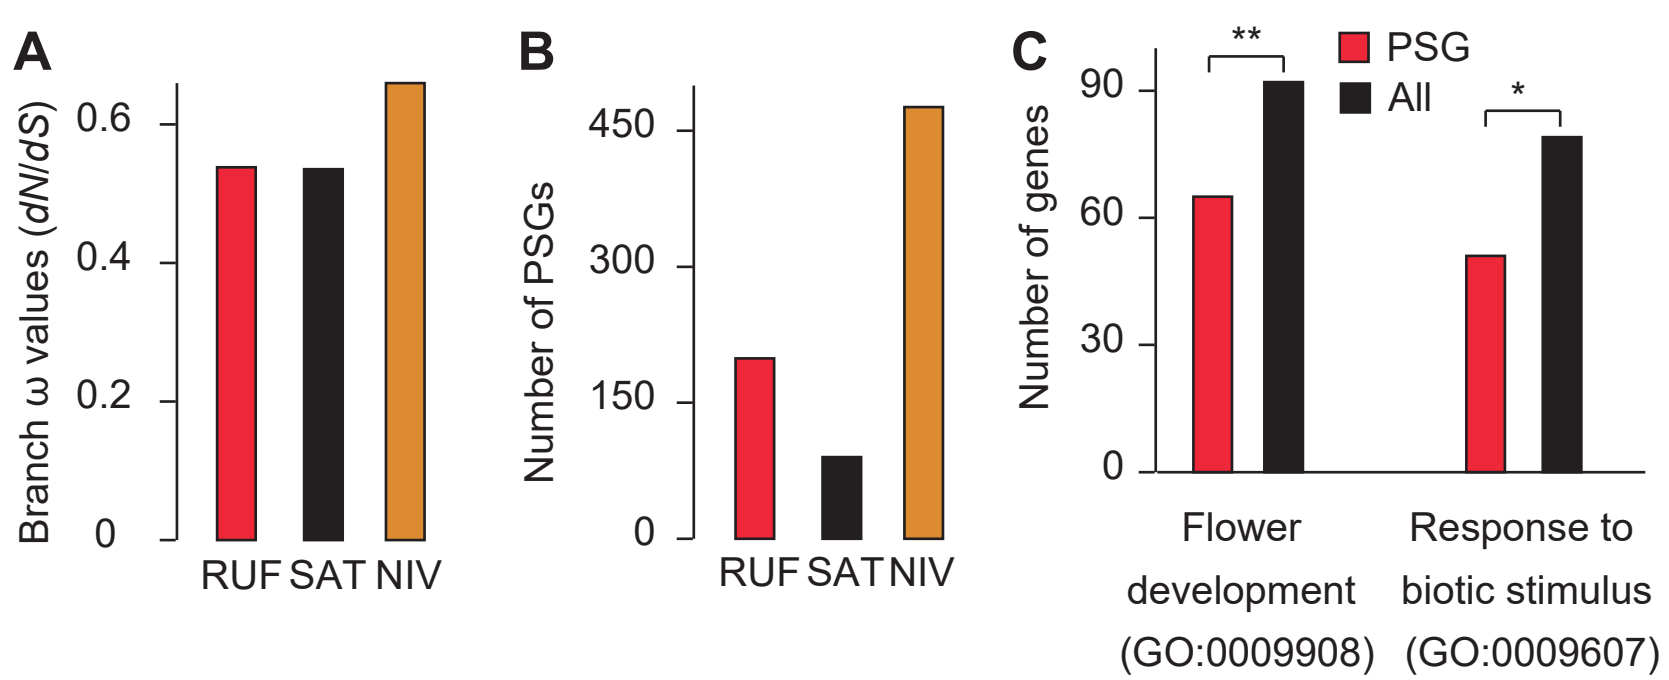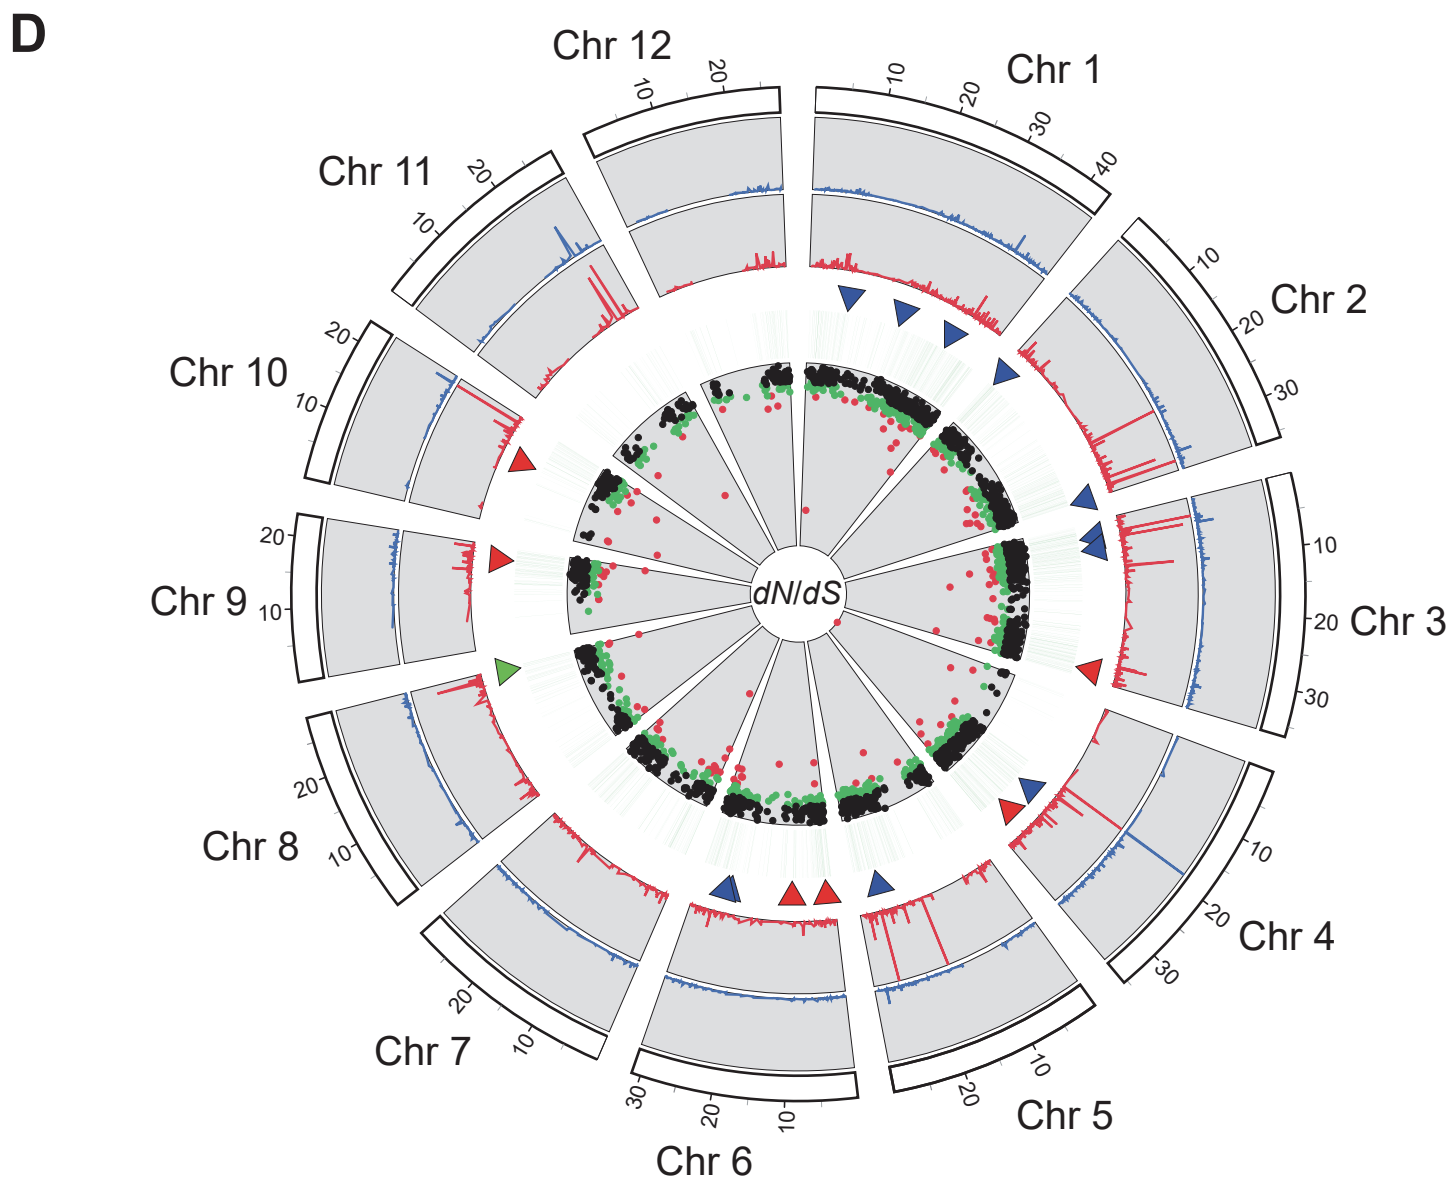

Source: https://www.biorxiv.org/content/10.1101/2020.01.14.905281v1.full.pdf
